# Supplementary material for: Heavy Metal Exposure Influences Double Strand Break DNA Repair Outcomes
Source: PubMed Central journal article supplement (PMC4788447; doi:10.1371/journal.pone.0151367), 2016-03-11
Supplement: pone.0151367.s001.pdf [file pone.0151367.s001.pdf]

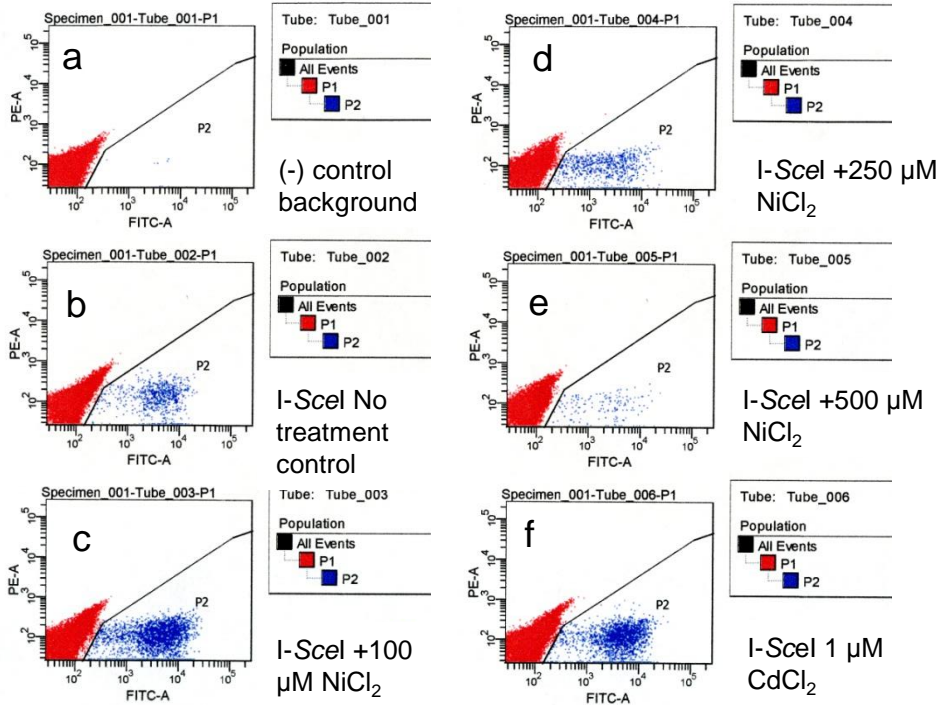

**Supplemental Figure S1. Representative FACS profiles of the U2OS DR-GFP cell line.** Shown is an example of the results from one experimental replicate. A logarithmic plot of the gated cells is shown using FITC-A (green fluorescence, x-axis) and PE-A (area of the pulse width, red fluorescence y-axis). Autofluorescence is detected on the diagonal, where cells showing increased green fluorescence are to the right of the diagonal. Autofluorescence are gated to determine the percentage of GFP+ cells (blue). In this example the cell line U2Os with the DR-GFP cassette was used to quantify homology-directed repair (HR). The examples shown are: **a.** untransfected untreated control to correct for background; **b.** I-SceI transfected no treatment control (used as the baseline or “0 %”); **c-f.** I-SceI transfected with different heavy metal treatments (100-500  $\mu\text{M}$  NiCl<sub>2</sub> and 1  $\mu\text{M}$  CdCl<sub>2</sub>). Note that 100  $\mu\text{M}$  NiCl<sub>2</sub> increases the signal relative to the control (**b**), while 500  $\mu\text{M}$  NiCl<sub>2</sub> decreases the signal.
