# Supplementary material for: Heavy Metal Exposure Influences Double Strand Break DNA Repair Outcomes
Source: PubMed Central journal article supplement (PMC4788447; doi:10.1371/journal.pone.0151367), 2016-03-11
Supplement: pone.0151367.s002.pdf [file pone.0151367.s002.pdf]

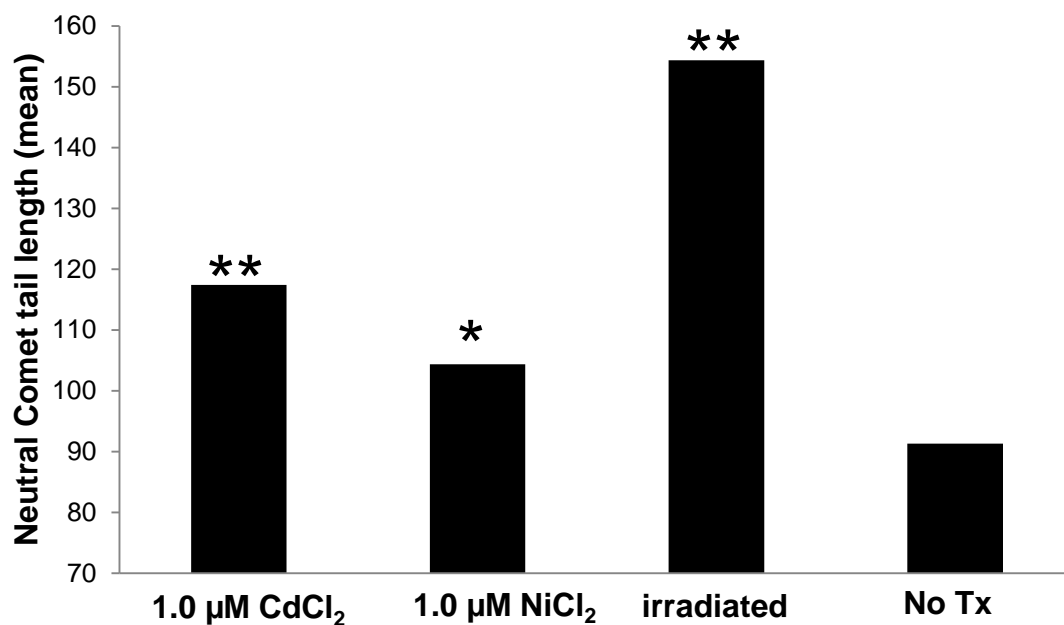

**Supplemental Figure S2. Cadmium and nickel treatments induce DNA breaks.** Neutral comet assay was performed for the detection of DNA breaks of cells after a 24 h heavy metal exposure. Gamma-irradiated cells were used as a positive control. Significant differences were observed for all treatments relative to the no treatment (no Tx) control [ $* P < 0.05$   $** P < 0.001$ , Student's paired T-test].
