# Supplementary material for: Heavy Metal Exposure Influences Double Strand Break DNA Repair Outcomes
Source: PubMed Central journal article supplement (PMC4788447; doi:10.1371/journal.pone.0151367), 2016-03-11
Supplement: pone.0151367.s006.pdf [file pone.0151367.s006.pdf]

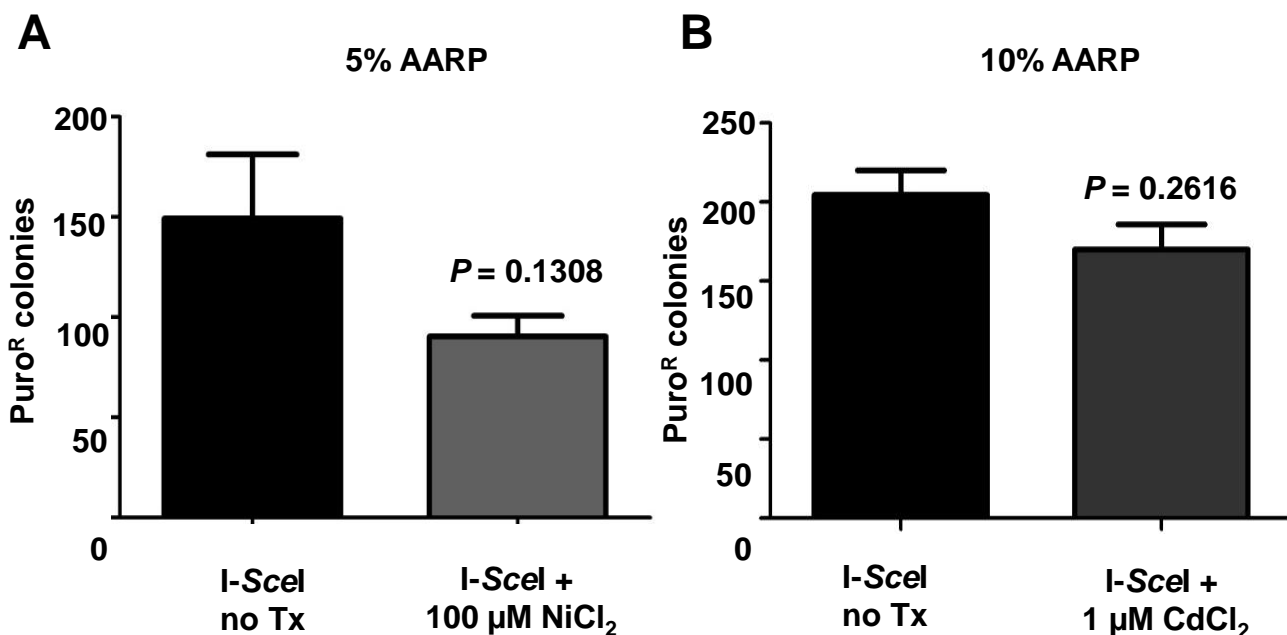

**Supplemental Figure S6. Metal exposure does not increase the rate of Alu-Alu recombination signal in I-SceI transfected cells.** The 5 and 10%AARP HEK cell lines were transfected with an I-SceI expression vector and incubated with media containing either **A.** 100 μM NiCl<sub>2</sub> or **B.** 1 μM CdCl<sub>2</sub> for 48 h before undergoing selection for 2 weeks with puromycin. Untreated cells were used as the reference control (no Tx). The results were expressed as mean ± SD of three biological replicates.
