# Supplementary material for: Heavy Metal Exposure Influences Double Strand Break DNA Repair Outcomes
Source: PubMed Central journal article supplement (PMC4788447; doi:10.1371/journal.pone.0151367), 2016-03-11
Supplement: pone.0151367.s007.pdf [file pone.0151367.s007.pdf]

**Supplemental Figure S7. Sequence alignment of recovered of simple and complex chimera events recovered after nickel treatment.** The specific nucleotides used to identify the Alu1-Alu2 boundaries are indicated in red for Alu2 and in blue for Alu1. **A.** 5% simple chimera, **B.** 5% complex chimera, **C.** 10% simple chimera and **D.** 10% complex chimera.

**A.** Alignment of the recovered simple chimera from 5%AARP treated with 100µM NiCl<sub>2</sub> is shown.

|          |                                                                                   |     |
|----------|-----------------------------------------------------------------------------------|-----|
| Majority | CTTAAAGGCCGGCGCGGTGGCTCAGGCCTGTAATCCCAGCACTTAGGGAGGCCGAGGCCGGGCGGTTTCACGAGGTCAGGA |     |
|          | -----+-----+-----+-----+-----+-----+-----+-----+-----+-----+-----+                |     |
|          | 170 180 190 200 210 220 230 240                                                   |     |
|          | -----+-----+-----+-----+-----+-----+-----+-----+-----+-----+                      |     |
| Alu2 5%  | -----GGCCGGGCGCGGTGGCTCAGGCCTGTAATCCCAGCACTTAGGGAGGCCGAGGCCGGGCGGATTCACGAGGTCAGGA | 74  |
| Alu1 5%  | -----GGCCGGGCGCGGTGGCTCAGGCCTGTAATCCCAGCACTTAGGGAGGCCGAGGCCGGGCGGTTTCACGAGGTCAGGA | 74  |
| Ni3      | CTTAAAGGCCGGCGCGGTGGCTCAGGCCTGTAATCCCAGCACTTAGGGAGGCCGAGGCCGGGCGGATTCACGAGGTCAGGA | 127 |
| Ni4      | CTTAAAGGCCGGCGCGGTGGCTCAGGCCTGTAATCCCAGCACTTAGGGAGGCCGAGGCCGGGCGGATTCACGAGGTCAGGA | 171 |
| Ni12     | CTTAAAGGCCGGCGCGGTGGCTCAGGCCTGTAATCCCAGCACTTAGGGAGGCCGAGGCCGGGCGGATTCACGAGGTCAGGA | 185 |
| Ni13     | CTTAAAGGCCGGCGCGGTGGCTCAGGCCTGTAATCCCAGCACTTAGGGAGGCCGAGGCCGGGCGGATTCACGAGGTCAGGA | 185 |
| Ni10     | CTTAAAGGCCGGCGCGGTGGCTCAGGCCTGTAATCCCAGCACTTAGGGAGGCCGAGGCCGGGCGGATTCACGAGGTCAGGA | 185 |
| Ni11     | CTTAAAGGCCGGCGCGGTGGCTCAGGCCTGTAATCCCAGCACTTAGGGAGGCCGAGGCCGGGCGGATTCACGAGGTCAGGA | 185 |
| Ni9      | CTTAAAGGCCGGCGCGGTGGCTCAGGCCTGTAATCCCAGCACTTAGGGAGGCCGAGGCCGGGCGGTTTCACGAGGTCAGGA | 185 |
| Ni2      | CTTAAAGGCCGGCGCGGTGGCTCAGGCCTGTAATCCCAGCACTTAGGGAGGCCGAGGCCGGGCGGTTTCACGAGGTCAGGA | 127 |
| Ni8      | CTTAAAGGCCGGCGCGGTGGCTCAGGCCTGTAATCCCAGCACTTAGGGAGGCCGAGGCCGGGCGGTTTCACGAGGTCAGGA | 185 |
| Ni22     | CTTAAAGGCCGGCGCGGTGGCTCAGGCCTGTAATCCCAGCACTTAGGGAGGCCGAGGCCGGGCGGTTTCACGAGGTCAGGA | 127 |
| Ni5      | CTTAAAGGCCGGCGCGGTGGCTCAGGCCTGTAATCCCAGCACTTAGGGAGGCCGAGGTTGGGCGGTTTCACGAGGTCAGGA | 140 |
| Ni1      | CTTAAAGGCCGGCGCGGTGGCTCAGGCCTGTAATCCCAGCACTTAGGGAGGCCGAGGCCGGGCGGTTTCACGAGGTCAGGA | 240 |

|          |                                                                                |     |
|----------|--------------------------------------------------------------------------------|-----|
| Majority | GATCGAGACAATCCTGGCTAACACGGTGAACCCCGTCTCTACTAAAAATACAAAAAATTAGCCGGCGTGGTGGCGGGC |     |
|          | -----+-----+-----+-----+-----+-----+-----+-----+-----+-----+-----+             |     |
|          | 250 260 270 280 290 300 310 320                                                |     |
|          | -----+-----+-----+-----+-----+-----+-----+-----+-----+-----+                   |     |
| Alu2 5%  | GATCGAGACAATCCTGGCTAACACGGTGAACCCCGTCTCTACTAAAAATACAAAAAATTAGCCGGCGTGGTGGCGGGC | 154 |
| Alu1 5%  | GATCGAGACAATCCTGGCTAACACGGTGAACCCCGTCTCTACTAAAAATACAAAAAATTAGCCGGCGTGGTGGCGGGC | 154 |
| Ni3      | GATCGAGACAATCCTGGCTAACACGGTGAACCCCGTCTCTACTAAAAATACAAAAAATTAGCCGGCGTGGTGGCGGGC | 207 |
| Ni4      | GATCGAGACAATCCTGGCTAACACGGTGAACCCCGTCTCTACTAAAAATACAAAAAATTAGCCGGCGTGGTGGCGGGC | 251 |
| Ni12     | GATCGAGACAATCCTGGCTAACACGGTGAACCCCGTCTCTACTAAAAATACAAAAAATTAGCCGGCGTGGTGGCGGGC | 265 |
| Ni13     | GATCGAGACAATCCTGGCTAACACGGTGAACCCCGTCTCTACTAAAAATACAAAAAATTAGCCGGCGTGGTGGCGGGC | 265 |
| Ni10     | GATCGAGACAATCCTGGCTAACACGGTGAACCCCGTCTCTACTAAAAATACAAAAAATTAGCCGGCGTGGTGGCGGGC | 265 |
| Ni11     | GATCGAGACAATCCTGGCTAACACGGTGAACCCCGTCTCTACTAAAAATACAAAAAATTAGCCGGCGTGGTGGCGGGC | 265 |
| Ni9      | GATCGAGACAATCCTGGCTAACACGGTGAACCCCGTCTCTACTAAAAATACAAAAAATTAGCCGGCGTGGTGGCGGGC | 265 |
| Ni2      | GATCGAGACAATCCTGGCTAACACGGTGAACCCCGTCTCTACTAAAAATACAAAAAATTAGCCGGCGTGGTGGCGGGC | 207 |
| Ni8      | GATCGAGACAATCCTGGCTAACACGGTGAACCCCGTCTCTACTAAAAATACAAAAAATTAGCCGGCGTGGTGGCGGGC | 265 |
| Ni22     | GATCGAGACAATCCTGGCTAACACGGTGAACCCCGTCTCTACTAAAAATACAAAAAATTAGCCGGCGTGGTGGCGGGC | 207 |
| Ni5      | GATCGAGACAATCCTGGCTAACACGGTGAACCCCGTCTCTACTAAAAATACAAAAAATTAGCCGGCGTGGTGGCGGGC | 220 |
| Ni1      | GATCGAGACAATCCTGGCTAACACGGTGAACCCCGTCTCTACTAAAAATACAAAAAATTAGCCGGCGTGGTGGCGGGC | 320 |

Majority GCCTGTAGTCCCAGCTACTCGGGAGGCTGAGGCAGGAGAATTGCGTGAACCCGGGAGGCGGAGCTTGCAGTGAGCCGAGA  
 -----+-----+-----+-----+-----+-----+-----+-----+-----+-----+  
                   330          340          350          360          370          380          390          400  
 -----+-----+-----+-----+-----+-----+-----+-----+-----+-----+  
 Alu2 5% GCCTGTAGTCCCAGCTACTCGGGAGGCTGAGGCAGGAGAATTGCGTGAACCCGGGAGGCGGAGCTTGCAGTGAGCCGAGA 234  
 Alu1 5% GCCTGAAAGTCCCAGCTACTCGGGAGCCTGAGGCAGGAGAATTGCGTGAACCCGGGAGGCGGAGCTAGCAGTGAGCCGAGA 234  
 Ni3 GCCTGTAGTCCCAGCTACTCGGGAGGCTGAGGCAGGAGAATTGCGTGAACCCGGGAGGCGGAGCTTGCAGTGAGCCGAGA 287  
 Ni4 GCCTGTAGTCCCAGCTACTCGGGAGGCTGAGGCAGGAGAATTGCGTGAACCCGGGAGGCGGAGCTTGCAGTGAGCCGAGA 331  
 Ni12 GCCTGTAGTCCCAGCTACTCGGGAGGCTGAGGCAGGAGAATTGCGTGAACCCGGGAGGCGGAGCTTGCAGTGAGCCGAGA 345  
 Ni13 GCCTGTAGTCCCAGCTACTCGGGAGGCTGAGGCAGGAGAATTGCGTGAACCCGGGAGGCGGAGCTTGCAGTGAGCCGAGA 345  
 Ni10 GCCTGTAGTCCCAGCTACTCGGGAGGCTGAGGCAGGAGAATTGCGTGAACCCGGGAGGCGGAGCTTGCAGTGAGCCGAGA 345  
 Ni11 GCCTGTAGTCCCAGCTACTCGGGAGGCTGAGGCAGGAGAATTGCGTGAACCCGGGAGGCGGAGCTTGCAGTGAGCCGAGA 345  
 Ni9 GCCTGTAGTCCCAGCTACTCGGGAGGCTGAGGCAGGAGAATTGCGTGAACCCGGGAGGCGGAGCTTGCAGTGAGCCGAGA 345  
 Ni2 GCCTGTAGTCCCAGCTACTCGGGAGGCTGAGGCAGGAGAATTGCGTGAACCCGGGAGGCGGAGCTTGCAGTGAGCCGAGA 287  
 Ni8 GCCTGTAGTCCCAGCTACTCGGGAGGCTGAGGCAGGAGAATTGCGTGAACCCGGGAGGCGGAGCTTGCAGTGAGCCGAGA 345  
 Ni22 GCCTGTAGTCCCAGCTACTCGGGAGGCTGAGGCAGGAGAATTGCGTGAACCCGGGAGGCGGAGCTTGCAGTGAGCCGAGA 287  
 Ni5 GCCTGTAGTCCCAGCTACTCGGGAGGCTGAGGCAGGAGAATTGCGTGAACCCGGGAGGCGGAGCTTGCAGTGAGCCGAGA 300  
 Ni1 GCCTGAAAGTCCCAGCTACTCGGGAGCCTGAGGCAGGAGAATTGCGTGAACCCGGGAGGCGGAGCTAGCAGTGAGCCGAGA 400

Majority TCGCGCCACTGCACTCCAGCCTGGGGACAGAGCGAGACTCCGTCTCAAAAAAAAAAAAAAAAAA-GAATTCTTTTCTGCAG  
 -----+-----+-----+-----+-----+-----+-----+-----+-----+-----+  
                   410          420          430          440          450          460          470          480  
 -----+-----+-----+-----+-----+-----+-----+-----+-----+-----+  
 Alu2 5% TCGCGCCACTGCACTCCAGCCTGGGGACAGAGCGAGACTCCGTCTC 281  
 Alu1 5% TCGCGCCACTGCACTCCAGCCTGGGGACAGAGCGAGACTCCGTCTC 281  
 Ni3 TCGCGCCACTGCACTCCAGCCTGGGGACAGAGCGAGACTCCGTCTCAAAAAAAAAAAAAAAAAA-AATTTTTTTTTTGNNG 366  
 Ni4 TCGCGCCACTGCACTCCAGCCTGGGGACAGAGCGAGACTCCGTCTCAAAAAAAAAAAAACAAAAGAATTCTTTTCTGCAG 411  
 Ni12 TCGCGCCACTGCACTCCAGCCTGGGGACAGAGCGAGACTCCGTCTCAAAAAAAAAAAAAAAAAA---GAATTCTTTTCTGCAG 422  
 Ni13 TCGCGCCACTGCACTCCAGCCTGGGGACAGAGCGAGACTCCGTCTCAAAAAAAAAAAAAAAAAA-GAATTCTTTTCTGCAG 424  
 Ni10 TCGCGCCACTGCACTCCAGCCTGGGGACAGAGCGAGACTCCGTCTCAAAAAAAAAAAAAAAAAA--GAATTCTTTTCTGCAG 423  
 Ni11 TCGCGCCACTGCACTCCAGCCTGGGGACAGAGCGAGACTCCGTCTCAAAAAAAAAAAAAAAAAA--GAATTCTTTTCTGCAG 423  
 Ni9 TCGCGCCACTGCACTCCAGCCTGGGGACAGAGCGAGACTCCGTCTCAAAAAAAAAAAAAAAAAAAGAATTCTTTTCTGCAG 425  
 Ni2 TCGCGCCACTGCACTCCAGCCTGGGGACAGAGCGAGACTCCGTCTCAAAAAAAAAAAAAAAAAA-AATTTTTTTTTTNNNG 366  
 Ni8 TCGCGCCACTGCACTCCAGCCTGGGGACAGAGCGAGACTCCGTCTCAAAAAAAAAAAAAAAAAA-GAATTCTTTTCTGCAG 424  
 Ni7 TCGCGCCACTGCACTCCAGCCTGGGGACAGAGCGAGACTCCGTCTCAAAAAAAAAAAAAAAAAA-GAATTCTTTTCTCCAG 423  
 Ni22 TCGCGCCACTGCACTCCAGCCTGGGGACAGAGCGAGACTCCGTCTCAAAAAAAAAAAAAAAAAAATTTTTTTTTNNNGG 367  
 Ni5 TCGCGCCACTGCACTCCAGCCTGGGGACAGAGCGAGACTCCGTCTCAAAAAAAAAAAAAA-----TTCTTTTCTGCAG 372  
 Ni1 TCGCGCCACTGCACTCCAGCCTGGGGACAGAGCGAGACTCCGTCTCAAAAAAAAAAAAAAAAAA-AATTTTTTTTTTGNNG 479

**B . Alignment of the recovered complex chimera from 5%AARP treated with 100µM NiCl<sub>2</sub> is shown.**

|          |                                                                                                                                                        |     |
|----------|--------------------------------------------------------------------------------------------------------------------------------------------------------|-----|
| Majority | GCTTAAAGGCCGGCGCGGTGGCTCAGGCCTGTAATCCCAGCACTTXGGGAGGCCGAGGCCGGCGGTTTCACGAGGTCAGG                                                                       |     |
|          | -----+-----+-----+-----+-----+-----+-----+-----+-----+-----+-----+-----+-----+-----+-----+-----                                                        |     |
|          | 170                  180                  190                  200                  210                  220                  230                  240 |     |
|          | -----+-----+-----+-----+-----+-----+-----+-----+-----+-----+-----+-----+-----+-----+-----+-----                                                        |     |
| Alu2 5%  | -----GGCCGGGCGCGGTGGCTCACGCCCTGTAATCCCAGCACTTTGGGAGGCCGAGGCCGGCGGATCACGAGGTCAGG                                                                        | 73  |
| Alu1 5%  | -----GGCCGGGCGCGGTGGCTCAGGCCCTGTAATCCCAGCACTTAGGGAGGCCGAGGCCGGCGGTTTCACGAGGTCAGG                                                                       | 73  |
| Ni14     | GCTTAAAGGCCGGGCGCGGTGGCTCAGGCCCTGTAATCCCAGCACTTAGGGAGGCCGAGGCCGGCGGTTTCACGAGGTCAGG                                                                     | 240 |
| Ni7      | GCTTAAAGGCCGGGCGCGGTGGCTCAGGCCCTGTAATCCCAGCACTTAGGGAGGCCGAGGCCGGCGGTTTCACGAGGTCAGG                                                                     | 184 |
| Ni6      | GCTTAAAGGCCGGGCGCGGTGGCTCAGGCCCTGTAATCCCAGCACTTAGGGAGGCCGAGGCCGGCGGTTTCACGAGGTCAGG                                                                     | 184 |
| Ni15     | GCTTAAAGGCCGGGCGCGGTGGCTCAGGCCCTGTAATCCCAGCACTTAGGGAGGCCGAGGCCGGCGGTTTCACGAGGTCAGG                                                                     | 240 |
| Ni16     | GCTTAAAGGCCGGGCGCGGTGGCTCAGGCCCTGTAATCCCAGCACTTAGGGAGGCCGAGGCCGGCGGTTTCACGAGGTCAGG                                                                     | 126 |
| Ni17     | GCTTAAAGGCCGGGCGCGGTGGCTCAGGCCCTGTAATCCCAGCACTTTGGGAGGCCGAGGCCGGCGGTTTCACGAGGTCAGG                                                                     | 126 |
| Ni18     | GCTTAAAGGCCGGGCGCGGTGGCTCAGGCCCTGTAATCCCAGCACTTTGGGAGGCCGAGGCCGGCGGATCACGAGGTCAGG                                                                      | 170 |
| Ni20     | GCTTAAAGGCCGGGCGCGGTGGCTCAGGCCCTGTAATCCCAGCACTTTGGGAGGCCGAGGCCGGCGGTTTCACGAGGTCAGG                                                                     | 170 |
| Ni21     | GCTTAAAGGCCGGGCGCGGTGGCTCAGGCCCTGTAATCCCAGCACTTAGGGAGGCCGAGGCCGGCGGATCACGAGGTCAGG                                                                      | 126 |
| Ni23     | GCTTAAAGGCCGGGCGCGGTGGCTCAGGCCCTGTAATCCCAGCACTTTGGGAGGCCGAGGCCGGCGGTTTCACGAGGTCAGG                                                                     | 130 |
| Ni24     | GCTTAAAGGCCGGGCGCGGTGGCTCAGGCCCTGTAATCCCAGCACTTAGGGAGGCCGAGGCCGGCGGATCACGAGGTCAGG                                                                      | 130 |
| Ni19     | GCTTAAAGGCCGGGCGCGGTGGCTCAGGCCCTGTAATCCCAGCACTTTGGGAGGCCGAGGCCGGCGGATCACGAGGTCAGG                                                                      | 170 |
| Ni25     | GCTTAAAGGCCGGGCGCGGTGGCTCAGGCCCTGTAATCCCAGCACTTTGGGAGGCCGAGGCCGGCGGATCACGAGGTCAGG                                                                      | 130 |
|          |                                                                                                                                                        |     |
| Majority | AGATCGAGACAATCCTGGCTAACACGXTGAAACCCCGTCTCTACTAAAAATACAAAAAATTAGCCGXGCGTGGTGGCGGG                                                                       |     |
|          | -----+-----+-----+-----+-----+-----+-----+-----+-----+-----+-----+-----+-----+-----+-----+-----                                                        |     |
|          | 250                  260                  270                  280                  290                  300                  310                  320 |     |
|          | -----+-----+-----+-----+-----+-----+-----+-----+-----+-----+-----+-----+-----+-----+-----+-----                                                        |     |
| Alu2 5%  | AGATCGAGACAATCCTGGCTAACACGGTGAAACCCCGTCTCTACTAAAAATACAAAAAATTAGCCGGCGTGGTGGCGGG                                                                        | 153 |
| Alu1 5%  | AGATCGTGACAATCCTGGCTAACACGCTGAAACCCCGTCTCTACTATAAAATACAAAAAATTAGCCGCGCGTGGTGGCGGG                                                                      | 153 |
| Ni14     | AGATCGTGACAATCCTGGCTAACACGCTGAAACCCCGTCTCTACTATAAAATACAAAAAATTAGCCGCGCGTGGTGGCGGG                                                                      | 320 |
| Ni7      | AGATCGTGACAATCCTGGCTAACACGCTGAAACCCCGTCTCTACTATAAAATACAAAAAATTAGCCGGCGTGGTGGCGGG                                                                       | 263 |
| Ni6      | AGATCGTGACAATCCTGGCTAACACGCTGAAACCCCGTCTCTACTATAAAATACAAAAAATTAGCCGGCGTGGTGGCGGG                                                                       | 263 |
| Ni15     | AGATCGAGACAATCCTGGCTAACACGCTGAAACCCCGTCTCTACTATAAAATACAAAAAATTAGCCGGCGTGGTGGCGGG                                                                       | 320 |
| Ni16     | AGATCGAGACAATCCTGGCTAACACGGTGAAACCCCGTCTCTACTATAAAATACAAAAAATTAGCCGCGCGTGGTGGCGGG                                                                      | 206 |
| Ni17     | AGATCGTGACAATCCTGGCTAACACGCTGAAACCCCGTCTCTACTATAAAATACAAAAAATTAGCCGGCGTGGTGGCGGG                                                                       | 206 |
| Ni18     | AGATCGAGACAATCCTGGCTAACACGCTGAAACCCCGTCTCTACTATAAAATACAAAAAATTAGCCGGCGTGGTGGCGGG                                                                       | 250 |
| Ni20     | AGATCGTGACAATCCTGGCTAACACGCTGAAACCCCGTCTCTACTATAAAATACAAAAAATTAGCCGCGCGTGGTGGCGGG                                                                      | 250 |
| Ni21     | AGATCGTGACAATCCTGGCTAACACGCTGAAACCCCGTCTCTACTATAAAATACAAAAAATTAGCCGGCGTGGTGGCGGG                                                                       | 206 |
| Ni23     | AGATCGAGACAATCCTGGCTAACACGCTGAAACCCCGTCTCTACTATAAAATACAAAAAATTAGCCGGCGTGGTGGCGGG                                                                       | 210 |
| Ni24     | AGATCGAGACAATCCTGGCTAACACGCTGAAACCCCGTCTTACTATAAAATACAAAAAATTAGCCGCGCGTGGTGGCGGG                                                                       | 210 |
| Ni19     | AGATCGAGACAATCCTGGCTAACACGCTGAAACCCCGTCTCTACTATAAAATACAAAAAATTAGCCGGCGTGGTGGCGGG                                                                       | 250 |
| Ni25     | AGATCGAGACAATCCTGGCTAACACGCTGAAACCCCGTCTCTACTATAAAATACAAAAAATTAGCCGCGCGTGGTGGCGGG                                                                      | 210 |

Majority CGCCTGTAGTCCCAGCTACTCGGGAGGCTGAGGCAGGAGAATTGCGTGAACCCGGGAGGCGGAGCTTGCAGTGAGCCGAG  
 -----+-----+-----+-----+-----+-----+-----+-----+-----+-----+  
 330 340 350 360 370 380 390 400

Alu2 5% CGCCTGTAGTCCCAGCTACTCGGGAGGCTGAGGCAGGAGAATTGCGTGAACCCGGGAGGCGGAGCTTGCAGTGAGCCGAG 233  
 Alu1 5% CGCCTGAAGTCCCAGCTACTCGGGAGCCTGAGGCAGGAGAATTGCGTGAACCCGGGAGGCGGAGCTAGCAGTGAGCCGAG 233  
 Ni14 CGCCTGAAGTCCCAGCTACTCGGGAGCCTGAGGCAGGAGAATTGCGTGAACCCGGGAGGCGGAGCTAGCAGTGAGCCGAG 400  
 Ni7 CGCCTGAAGTCCCAGCTACTCGGGAGCCTGAGGCAGGAGAATTGCGTGAACCCGGGAGGCGGAGCTAGCAGTGAGCCGAG 343  
 Ni6 CGCCTGAAGTCCCAGCTACTCGGGAGCCTGAGGCAGGAGAATTGCGTGAACCCGGGAGGCGGAGCTAGCAGTGAGCCGAG 343  
 Ni15 CGCCTGTAGTCCCAGCTACTCGGGAGGCTGAGGCAGGAGAATTGCGTGAACCCGGGAGGCGGAGCTAGCAGTGAGCCGAG 400  
 Ni16 CGCCTGTAGTCCCAGCTACTCGGGAGGCTGAGGCAGGAGAATTGCGTGAACCCGGGAGGCGGAGCTTGCAGTGAGCCGAG 286  
 Ni17 CGCCTGTAGTCCCAGCTACTCGGGAGGCTGAGGCAGGAGAATTGCGTGAACCCGGGAGGCGGAGCTTGCAGTGAGCCGAG 286  
 Ni18 CGCCTGTAGTCCCAGCTACTCGGGAGGCTGAGGCAGGAGAATTGCGTGAACCCGGGAGGCGGAGCTTGCAGTGAGCCGAG 330  
 Ni20 CGCCTGTAGTCCCAGCTACTCGGGAGCCTGAGGCAGGAGAATTGCGTGAACCCGGGAGGCGGAGCTAGCAGTGAGCCGAG 330  
 Ni21 CGCCTGTAGTCCCAGCTACTCGGGAGGCTGAGGCAGGAGAATTGCGTGAACCCGGGAGGCGGAGCTTGCAGTGAGCCGAG 286  
 Ni23 CGCCTGTAGTCCCAGCTACTCGGGAGCCTGAGGCAGGAGAATTGCGTGAACCCGGGAGGCGGAGCTAGCAGTGAGCCGAG 290  
 Ni24 CGCCTGAAGTCCCAGCTACTCGGGAGGCTGAGGCAGGAGAATTGCGTGAACCCGGGAGGCGGAGCTTGCAGTGAGCCGAG 290  
 Ni19 CGCCTGTAGTCCCAGCTACTCGGGAGGCTGAGGCAGGAGAATTGCGTGAACCCGGGAGGCGGAGCTTGCAGTGAGCCGAG 330  
 Ni25 CGCCTGAAGTCCCAGCTACTCGGGAGCCTGAGGCAGGAGAATTGCGTGAACCCGGGAGGCGGAGCTTGCAGTGAGCCGAG 290

Majority ATCGCGCCACTGCACTCCAGCCTGGGCGACAGAGCGAGACTCCGTCTCAAAAAAAAAAAAAAAAAAAATTTTTTTTGGXXG  
 -----+-----+-----+-----+-----+-----+-----+-----+-----+-----+  
 410 420 430 440 450 460 470 480

Alu2 5% ATCGCGCCACTGCACTCCAGCCTGGGCGACAGAGCGAGACTCCGTCTC 281  
 Alu1 5% ATCGCGGCACTGCACTCCAGCCTGGGCGACAGAGCGAGACTCCGTCTC 281  
 Ni14 ATCGCGGCACTGCACTCCAGCCTGGGCGACAGAGCGAGACTCCGTCTCAAAAAAAAAAAAAAAAAAAATTTTTTTTGGNGG 480  
 Ni7 ATCGCGGCACTGCACTCCAGCCTGGGCGACAGAGCGAGACTCCGTCTCAAAAAAAAAAAAAAAAAAA-GAATTCCTTTCTCCA 422  
 Ni6 ATCGCGGCACTGCACTCCAGCCTGGGCGACAGAGCGAGACTCCGTCTCAAAAAAAAAAAAAAAAAAAAGAATTCCTTTCTGCA 422  
 Ni15 ATCGCGCCACTGCACTCCAGCCTGGGCGACAGAGCGAGACTCCGTCTCAAAAAAAAAAAAAAAAAAAATTTTTTTTGGNGG 480  
 Ni16 ATCGCGCCACTGCACTCCAGCCTGGGCGACAGAGCGAGACTCCGTCTCAAAAAAAAAAAAAAAAAAAATTTTTTTTGGNGG 366  
 Ni17 ATCGCGCCACTGCACTCCAGCCTGGGCGACAGAGCGAGACTCCGTCTCAAAAAAAAAAAAAAAAAAAATTTTTTTTGGNGG 366  
 Ni18 ATCGCGCCACTGCACTCCAGCCTGGGCGACAGAGCGAGACTCCGTCTCAAAAAAAAAAAAAAAAAAAAGAATTCCTTTCTGCAG 410  
 Ni19 ATCGCGCCACTGCACTCCAGCCTGGGCGACAGAGCGAGACTCCGTCTCAAAAAAAAAAAAAAAAAAAAGAATT-TTTTNNCGAG 409  
 Ni20 ATCGCGGCACTGCACTCCAGCCTGGGCGACAGAGCGAGACTCCGTCTCAAAAAAAAAAAAAAAAAAAAGAA-TTCTTTCTGCAG 409  
 Ni21 ATCGCGCCACTGCACTCCAGCCTGGGCGACAGAGCGAGACTCCGTCTCAAAAAAAAAAAAAAAAAAAATTTTTTTTGGNGG 366  
 Ni22 ATCGCGCCACTGCACTCCAGCCTGGGCGACAGAGCGAGACTCCGTCTCAAAAAAAAAAAAAAAAAAAATTTTTTTTNNNG 366  
 Ni23 ATCGCGCCACTGCACTCCAGCCTGGGCGACAGAGCGAGACTCCGTCTCAAAAAAAAAAAAAAAAAAAAG---NTNNN 360  
 Ni24 ATCGCGCCACTGCACTCCAGCCTGGGCGACAGAGCGAGACTCCGTCTCNNNNNNNNNNNNNNNAAANN 360  
 Ni19 ATCGCGCCACTGCACTCCAGCCTGGGCGACAGAGCGAGACTCCGTCTCAAAAAAAAAAAAAAAAAAAAGAATT-TTTTNNCGAG 409  
 Ni25 ATCGCGCCACTGCACTCCAGCCTGGGCGACAGAGCGAGACTCCGTCTCAAAAAAAAAAAAAAAAAAAAG----- 354

C. Alignment of the recovered simple chimera from 10%AARP treated with 100µM NiCl<sub>2</sub> is shown.

|          |                                                                                                |     |
|----------|------------------------------------------------------------------------------------------------|-----|
| Majority | CAGGCTTGGTACCGAGAAGCTTAAAGGCCGGGCGTGGTGGCTCAGGCCTGTAATGCCAGCACTTAGGGAGGCCGAGGCCG               |     |
|          | -----+-----+-----+-----+-----+-----+-----+-----+-----+-----+-----+-----+                       |     |
|          | 90          100          110          120          130          140          150          160  |     |
|          | -----+-----+-----+-----+-----+-----+-----+-----+-----+-----+-----+-----+                       |     |
| Alu2 10% | -----GGCCGGGCGCGGTGGCTCACGCCTGTAATCCAGCACTTGGGAGGCCGAGGCCG                                     | 55  |
| Alu1 10% | -----GGCCGGGCGGTGGCTGGCTCAGGCCTGTAATGCCAGCACTAGGGAGGCCGTGGCGG                                  | 55  |
| Ni34     | CAGGCTTGGTACCGAGAAGCTTAAAGGCCGGGCGTGGTGGCTCAGGCCTGTAATGCCAGCACTAGGGAGGCCGTGGCGG                | 90  |
| Ni26     | CAGGCTTGGTACCGAGAAGCTTAAAGGCCGGGCGTGGTGGCTCAGGCCTGTAATGCCAGCACTAGGGAGGCCGCGGCCG                | 160 |
| Ni29     | CAGGCTTGGTACCGAGAAGCTTAAAGGCCGGGCGTGGTGGCTCAGGCCTGTAATGCCAGCACTAGGGAGGCCGTGGCGG                | 90  |
| Ni32     | CAGGCTTGGTACCGAGAAGCTTAAAGGCCGGGCGTGGTGGCTCAGGCCTGTAATCCAGCACTTGGGAGGCCGAGGCCG                 | 90  |
| Ni30     | CAGGCTTGGTACCGAGAAGCTTAAAGGCCGGGCGTGGTGGCTCAGGCCTGTAATCCAGCACTTGGGAGGCCGAGGCCG                 | 90  |
| Ni42     | CAGGCTTGGTACCGAGAAGCTTAAAGGCCGGGCGTGGTGGCTCAGGCCTGTAATCCAGCACTTGGGAGGCCGAGGCCG                 | 99  |
| Ni27     | CAGGCTTGGTACCGAGAAGCTTAAAGGCCGGGCGCGGTGGCTCACGCCTGTAATCCAGCACTTGGGAGGCCGAGGCCG                 | 90  |
| Ni28     | CAGGCTTGGTACCGAGAAGCTTAAAGGCCGGGCGCGGTGGCTCACGCCTGTAATCCAGCACTTGGGAGGCCGAGGCCG                 | 160 |
| Majority | GCGGATCACGAGGTCAGGAGATCGAGACAATCCTGGCTAACACGGTGAACCCCGTCTCTACTAAAAATACAAAAAATTA                |     |
|          | -----+-----+-----+-----+-----+-----+-----+-----+-----+-----+-----+-----+                       |     |
|          | 170          180          190          200          210          220          230          240 |     |
|          | -----+-----+-----+-----+-----+-----+-----+-----+-----+-----+-----+-----+                       |     |
| Alu2 10% | GCGGATCACGAGGTCAGGAGATCGAGACAATCCTGGCTAACACGGTGAACCCCGTCTCTACTAAAAATACAAAAAATTA                | 135 |
| Alu1 10% | GCGGATCACGAGGTCAGGAGATCGAGACAATCCTGGCTAACACGGTGAACCCCGTCTCTACTAAAAATACAAAAAATTA                | 135 |
| Ni34     | GCGGATCACGAGGTCAGGAGATCGAGACAATCCTGGCTAACACGGTGAACCCCGTCTCTACTAAAAATACAAAAAATTA                | 170 |
| Ni26     | GCGGATCACGAGGTCAGGAGATCGAGACAATCCTGGCTAACACGGTGAACCCCGTCTCTACTAAAAATACAAAAAATTA                | 240 |
| Ni29     | GCGGATCACGAGGTCAGGAGATCGAGACAATCCTGGCTAACACGGTGAACCCCGTCTCTACTAAAAATACAAAAAATTA                | 170 |
| Ni32     | GCGGATCACGAGGTCAGGAGATCGAGACAATCCTGGCTAACACGGTGAACCCCGTCTCTACTAAAAATACAAAAAATTA                | 170 |
| Ni30     | GCGGATCACGAGGTCAGGAGATCGAGACAATCCTGGCTAACACGGTGAACCCCGTCTCTAGNAAAAAATACAAAAAATTA               | 170 |
| Ni42     | GCGGATCACGAGGTCAGGAGATCGAGACAATCCTGGCTAACACGGTGAACCCCGTCTCTACTAAAAATACAAAAAATTA                | 179 |
| Ni27     | GCGGATCACGAGGTCAGGAGATCGAGACAATCCTGGCTAACACGGTGAACCCCGTCTCTACTAAAAATACAAAAAATTA                | 170 |
| Ni28     | GCGGATCACGAGGTCAGGAGATCGAGACAATCCTGGCTAACACGGTGAACCCCGTCTCTACTAAAAATACAAAAAATTA                | 240 |
| Majority | GCCGGGCGTGGTGGCGGGCGCCTGTAGTCCCAGCTACTCGGGAGGCTGAGGCAGGAGAATTGCGTGAACCCGGGAGGCCG               |     |
|          | -----+-----+-----+-----+-----+-----+-----+-----+-----+-----+-----+-----+                       |     |
|          | 250          260          270          280          290          300          310          320 |     |
|          | -----+-----+-----+-----+-----+-----+-----+-----+-----+-----+-----+-----+                       |     |
| Alu2 10% | GCCGGGCGTGGTGGCGGGCGCCTGTAGTCCCAGCTACTCGGGAGGCTGAGGCAGGAGAATTGCGTGAACCCGGGAGGCCG               | 215 |
| Alu1 10% | GCCGGGCGTGGTGGCGGGCGCCTGTAGTCCCAGCAACTCGGGAGCCTGAGGCAGGAGAATTGCGTGAACCCGGGTGGCGG               | 215 |
| Ni34     | GCCGGGCGTGGTGGCGGGCGCCTGTAGTCCCAGCAACTCGGGAGCCTGAGGCAGGAGAATTGCGTGAACCCGGGTGGCGG               | 250 |
| Ni26     | GCCGGGCGTGGTGGCGGGCGCCTGTAGTCCCAGCAACTCGGGAGCCTGAGGCAGGAGAATTGCGTGAACCCGGGTGGCGG               | 320 |
| Ni29     | GCCGGGCGTGGTGGCGGGCGCCTGTAGTCCCAGCTACTCGGGAGGCTGAGGCAGGAGAATTGCGTGAACCCGGGAGGCCG               | 250 |
| Ni32     | GCCGGGCGTGGTGGCGGGCGCCTGTAGTCCCAGCTACTCGGGAGGCTGAGGCAGGAGAATTGCGTGAACCCGGGAGGCCG               | 250 |
| Ni30     | NCCGGGCGTGGTGGCGGGCGCCTGTAGTCCCAGCTACTCGGGAGGCTGAGGCAGGAGAATTGCGTGAACCCGGGAGGCCG               | 250 |
| Ni42     | GCCGGGCGTGGTGGCGGGCGCCTGTAGTCCCAGCTACTCGGGAGGCTGAGGCAGGAGAATTGCGTGAACCCGGGAGGCCG               | 259 |
| Ni27     | GCCGGGCGTGGTGGCGGGCGCCTGTAGTCCCAGCTACTCGGGAGGCTGAGGCAGGAGAATTGCGTGAACCCGGGAGGCCG               | 250 |
| Ni28     | GCCGGGCGTGGTGGCGGGCGCCTGTAGTCCCAGCTACTCGGGAGGCTGAGGCAGGAGAATTGCGTGAACCCGGGAGGCCG               | 320 |

|          |                                                                                                |     |
|----------|------------------------------------------------------------------------------------------------|-----|
| Majority | AGCTTGCAGTGAGCCGAGATCGCGCCACTGCACTCCAGCCTGGGCGACAGAGCGAGACTCCGTCTCAAAAAAAAAAAAAA               |     |
|          | -----+-----+-----+-----+-----+-----+-----+-----+-----+-----+-----+-----+                       |     |
|          | 330          340          350          360          370          380          390          400 |     |
|          | -----+-----+-----+-----+-----+-----+-----+-----+-----+-----+-----+-----+                       |     |
| Alu2 10% | AGCTTGCAGTGAGCCGAGATCGCGCCACTGCACTCCAGCCTGGGCGACAGAGCGAGACTCCGTCTCAAAAAAAAAAAAAA               | 295 |
| Alu1 10% | AGCTAGCAGTGAGCGGAGATCGCGGCACTGCACTGCAGCCTGGGGACAGAGCGTGACTCCGTCAAAAAAAAAATAAAAA                | 295 |
| Ni34     | AGCTAGCANNAGAGCGGAGATCGCGGCACTGCNNTGCAGCCTGGGGACANAACGTGACTCCGTCAAAAAAAAAATAAAA                | 330 |
| Ni26     | AGCTAGCAGTGAGCGGAGATCGCGGCACTGCACTGCAGCCTGGGCGACAGAGCGAGACTCCGTCTCAAAAAAAAAAAAAA               | 400 |
| Ni29     | AGCTTGCAGTGAGCCGAGATCGCGCCACTGCACTCCAGCCTGGGCGACAGAGNGAGACTCCGTCTCAAATAAAAAAAAAA               | 330 |
| Ni32     | AGCTTGCATTGAGCCGAGATCGCGCCACTGCACTCCAGCCTGGGCGACAGAGCGAGACTCCGTCTCAAAAAAAAAAAAAA               | 330 |
| Ni30     | AGCTTGCAGTGANC CGAGATCGCGCCACTGCACTCCAGCCTGGGCGACAGAGCGAGACTCCGTCTCAAAAAAAAAAAAAA              | 330 |
| Ni42     | AGCTTGCAGTGAGCCGAGATCACGCCACTGCACTCCAGCCTGGGCGACAGAGCGAGACTCCGTCTCAAAAAAAAAAAAAA               | 339 |
| Ni27     | AGCTTGCAGTGAGCCGAGATCGCGCCACTGCACTCCAGCCTGGGCGACAGAGCGAGACTCCGTCTCAAAAAAAAAAAAAA               | 330 |
| Ni28     | AGCTTGCAGTGAGCCGAGATCGCGCCACTGCACTCCAGCCTGGGCGACAGAGCGAGACTCCGTCTCAAAAAAAAAAAAAA               | 400 |

D . Alignment of the recovered complex chimera from 10%AARP treated with 100µM NiCl<sub>2</sub> is shown.

|          |                                                                                               |     |
|----------|-----------------------------------------------------------------------------------------------|-----|
| Majority | CAGGCTTGGTACCGAGAAGCTTAAAGGCCGGGCGTGGTGGCTCAGGCCTGTAATGCCAGCACTTAGGGAGGCCGXGGCGG              |     |
|          | -----+-----+-----+-----+-----+-----+-----+-----+-----+-----+-----+-----+                      |     |
|          | 90          100          110          120          130          140          150          160 |     |
|          | -----+-----+-----+-----+-----+-----+-----+-----+-----+-----+-----+-----+                      |     |
| Alu2 10% | -----GGCCGGGCGCGGTGGCTCAGCCTGTAATCCAGCACTTGGGAGGCCGAGGCCG                                     | 55  |
| Alu1 10% | -----GGCCGGGCGTGGTGGCTCAGCCTGTAATGCCAGCACTTAGGGAGGCCGTGGCG                                    | 55  |
| Ni31     | CAGGCTTGGTACCGAGAAGCTTAAAGGCCGGGCGTGGTGGCTCAGCCTGTAATGCCAGCACTTGGGAGGCCGAGGCCG                | 90  |
| Ni35     | CAGGCTTGGTACCGAGAAGCTTAAAGGCCGGGCGTGGTGGCTCAGCCTGTAATGCCAGCACTTAGGGAGGCCGTGGCG                | 160 |
| Ni36     | CAGGCTTGGTACCGAGAAGCTTAAAGGCCGGGCGTGGTGGCTCAGCCTGTAATGCCAGCACTTAGGGAGGCCGTGGCG                | 90  |
| Ni37     | CAGGCTTGGTACCGAGAAGCTTAAAGGCCGGGCGTGGTGGCTCAGCCTGTAATCCAGCACTTGGGAGGCCGAGGCCG                 | 90  |
| Ni38     | CAGGCTTGGTACCGAGAAGCTTAAAGGCCGGGCGTGGTGGCTCAGCCTGTAATCCAGCACTTAGGGAGGCCGAGGCCG                | 90  |
| Ni33     | CAGGCTTGGTACCGAGAAGCTTAAAGGCCGGGCGTGGTGGCTCAGCCTGTAATGCCAGCACTTAGGGAGGCCGAGGCCG               | 90  |
| Ni39     | CAGGCTTGGTACCGAGAAGCTTAAAGGCCGGGCGTGGTGGCTCAGCCTGTAATGCCAGCACTTAGGGAGGCCGTGGCGT               | 121 |
| Ni40     | CAGGCTTGGTACCGAGAAGCTTAAAGGCCGGGCGTGGTGGCTCAGCCTGTAATGCCAGCACTTGGGAGGCCGAGGCCG                | 121 |
| Ni41     | CAGGCTTGGTACCGAGAAGCTTAAAGGCCGGGCGTGGTGGCTCAGCCTGTAATGCCAGCACTTAGGGAGGCCGTGGCG                | 121 |

Majority GCGGXTCACGAGGT XAGGAGATCGAGACAATCCTGGCTAACACGCTGAAACCCXGTCTCTACTATAAAATACAAAAATTA  
 -----+-----+-----+-----+-----+-----+-----+-----+-----+-----+  
           170      180      190      200      210      220      230      240  
 -----+-----+-----+-----+-----+-----+-----+-----+-----+-----+  
 Alu2 10% GCGGATCACGAGGT CAGGAGATCGAGACAATCCTGGCTAACACGCTGAAACCCCGTCTCTACTATAAAATACAAA AATTA 135  
 Alu1 10% GCGGATCACGAGGT CAGGAGATCGAGACAATCCTGGCTAACACGCTGAAACCCCGTCTCTACTATAAAATACAAA TAATTA 135  
 Ni31 GCGGATCACGAGGT CAGGAGATCGAGACAATCCTGGCTAACACGCTGAAACCCCGTCTCTACTATAAAATACAAA AATTA 170  
 Ni35 GCGGATCACGAGGT CAGGAGATCGAGACAATCCTGGCTAACACGCTGAAACCCCGTCTCTACTATAAAATACAAA TAATTA 240  
 Ni36 GCGGATCACGAGGT CAGGAGATCGAGACAATCCTGGCTAACACGCTGAAACCCCGTCTCTACTATAAAATACAAA AATTA 170  
 Ni37 GCGGATCACGAGGT CAGGAGATCGAGACAATCCTGGCTAACACGCTGAAACCCCGTCTCTACTATAAAATACAAA TAATTA 170  
 Ni38 GCGGATCACGAGGT CAGGAGATCGAGACAATCCTGGCTAACACGCTGAAACCCCGTCTCTACTATAAAATACAAA AATTA 170  
 Ni33 GCGGATCACGAGGT CAGGAGATCGAGACAATCCTGGCTAACACGCTGAAACCCCGTCTCTACTATAAAATACAAA TAATTA 170  
 Ni39 GCGGATCACGAGGT CAGGAGATCGAGACAATCCTGGCTAACACGCTGAAACCCCGTCTCTACTATAAAATACAAA AATTA 201  
 Ni40 GCGGATCACGAGGT CAGGAGATCGAGACAATCCTGGCTAACACGCTGAAACCCCGTCTCTACTATAAAATACAAA AATTA 201  
 Ni41 GCGGATCACGAGGT CAGGAGATCGAGACAATCCTGGCTAACACGCTGAAACCCCGTCTCTACTATAAGATACAAA TAATTA 201

Majority GCCGCGCGTGGTGGCGGGCGCCTGTAGTCCCAGCTACTCGGGAGGCTGAGGCAGGAGAATTGCGTGAACCCGGGAGGCGG  
 -----+-----+-----+-----+-----+-----+-----+-----+-----+-----+  
           250      260      270      280      290      300      310      320  
 -----+-----+-----+-----+-----+-----+-----+-----+-----+-----+  
 Alu2 10% GCCGGCGTGGTGGCGGGCGCCTGTAGTCCCAGCTACTCGGGAGGCTGAGGCAGGAGAATTGCGTGAACCCGGGAGGCGG 215  
 Alu1 10% GCCGCGCGTGGTGGCGGGCGCCTGAAGTCCCAGCAACTCGGGAGCCTGAGGCAGCAGAATTGCGAGAACCCGGGTGGCGG 215  
 Ni31 GCCGGCGTGGTGGCGGGCGCCTGTAGTCCCAGCTACTCGGGAGGCTGAGGCAGCAGAATTGCGTGAACCCGGGAGGCGG 250  
 Ni35 GCCGCGCGTGGTGGCGGGCGCCTGTAGTCCCAGCTACTCGGGAGGCCGAGGCAGGAGAATTGCGTGAACCCGGGAGGCGG 320  
 Ni36 GCCGCGCGTGGTGGCGGGCGCCTGAAGTCCCAGCTACTCGGGAGGCTGAGGCAGGAGAATTGCGTGAACCCGGGAGGCGG 250  
 Ni37 GCCGCGCGTGGTGGCGGGCGCCTGTAGTCCCAGCTACTCGGGAGGCTGAGGCAGGAGAATTGCGTGAACCCGGGAGGCGG 250  
 Ni38 GCCGGCGTGGTGGCGGGCGCCTGTAGTCCCAGCTACTCGGGAGGCTGAGGCAGGAGAATTGCGTGAACCCGGGAGGCGG 250  
 Ni33 GCCGCGCGTGGTGGCGGGCGCCTGTAGTCCCAGCTACTCGGGAGGCTGAGGCAGGAGAATTGCGTGAACCCGGGAGGCGG 250  
 Ni39 GCCGCGCGTGGTGGCGGGCGCCTGAAGTCCCAGCTACTCGGGAGCCTGAGGCAGCAGAATTGCGAGAACCCGGGTGGCGG 281  
 Ni40 GCCGGCGTGGTGGCGGGCGCCTGTAGTCCCAGCTACTCGGGAGGCTGAGGCAGCANAATTGCGAGAACCCGGGTGGCGG 281  
 Ni41 GCCGCGCGTGGTGGCGGGCGCCTGAAGTCCCAGCAACTCGGGAGCCTGAGGCAGGAGAATTGCGTGAACCCGGGTGGCGG 281

Majority AGCTTGCAGTGAGCCGAGATCGCGCCACTGCCTCCAGCCTGGGCGACAGAGCGAGACTCCGTCTCAAAAAAAAAAAAAA  
 -----+-----+-----+-----+-----+-----+-----+-----+-----+-----+  
           330      340      350      360      370      380      390      400  
 -----+-----+-----+-----+-----+-----+-----+-----+-----+-----+  
 Alu2 10% AGCTTGCAGTGAGCCGAGATCGCGCCACTGCCTCCAGCCTGGGCGACAGAGCGAGACTCCGTCTCAAAAAAAAAAAAAA 295  
 Alu1 10% AGCTAGCAGTGAGCCGAGATCGCGCCACTGCCTCCAGCCTGGGCGACAGAGCGTACTCCGTCTCAAAAAAAAAAAAAA 295  
 Ni31 AGCTTGCAGTGAGCCGAGATCGCGCCACTGCCTCCAGCCTGGGCGACAGAGCGAGACTCCGTCTCAAAAAAAAAAAAAA 330  
 Ni35 AGCTTGCAGTGAGCCGAGATCGCGCCACTGCCTCCAGCCTGGGCGACAGAGCGAGACTCCGTCTCAAAAAAAAAAAAAA 400  
 Ni36 AGCTTGCAGTGAGCCGAGATCGCGCCACTGCCTCCAGCCTGGGCGACAGAGCGAGACTCCGTCTCAAAAAAAAAAAAAA 330  
 Ni37 AGCTTGCAGTGAGCCGAGATCGCGCCACTGCCTCCAGCCTGGGCGACACAGCGAGACTCCGTCTCAAAAAAAAAAAAAA 330  
 Ni38 AGCTTGCAGTGAGCCGAGATCGCGCCACTGCCTCCAGCCTGGGCGACAGAGCGAGACTCCGTCTCAAAAAAAAAAAAAA 330  
 Ni33 AGCTTGCAGTGAGCCGAGATCGCGCCACTGCCTCCAGCCTGGGCGACACAGCGAGACTCCGTCTCAAAAAAAAAAAAAA 330  
 Ni39 AGCTAGCAGTGAGCCGAGATCGCGCCACTGCCTCCAGCCTGGGCGACAGAGCGAGACTCCGTCTCAAAAAAAAAAAAAA 361  
 Ni40 AGCTAGCAGTGAGCCGAGATCGCGCCACTGCCTCCAGCCTGGGCGACAGAGCGAGACTCCGTCTCAAAAAAAAAAAAAA 361  
 Ni41 AGCTAGCAGTGAGCCGAGATCGCGCCACTGCCTCCAGCCTGGGCGACAGAGCGAGACTCCGTCTCAAAAAAAAAAAAAA 361
