# Supplementary material for: Heavy Metal Exposure Influences Double Strand Break DNA Repair Outcomes
Source: PubMed Central journal article supplement (PMC4788447; doi:10.1371/journal.pone.0151367), 2016-03-11
Supplement: pone.0151367.s008.pdf [file pone.0151367.s008.pdf]

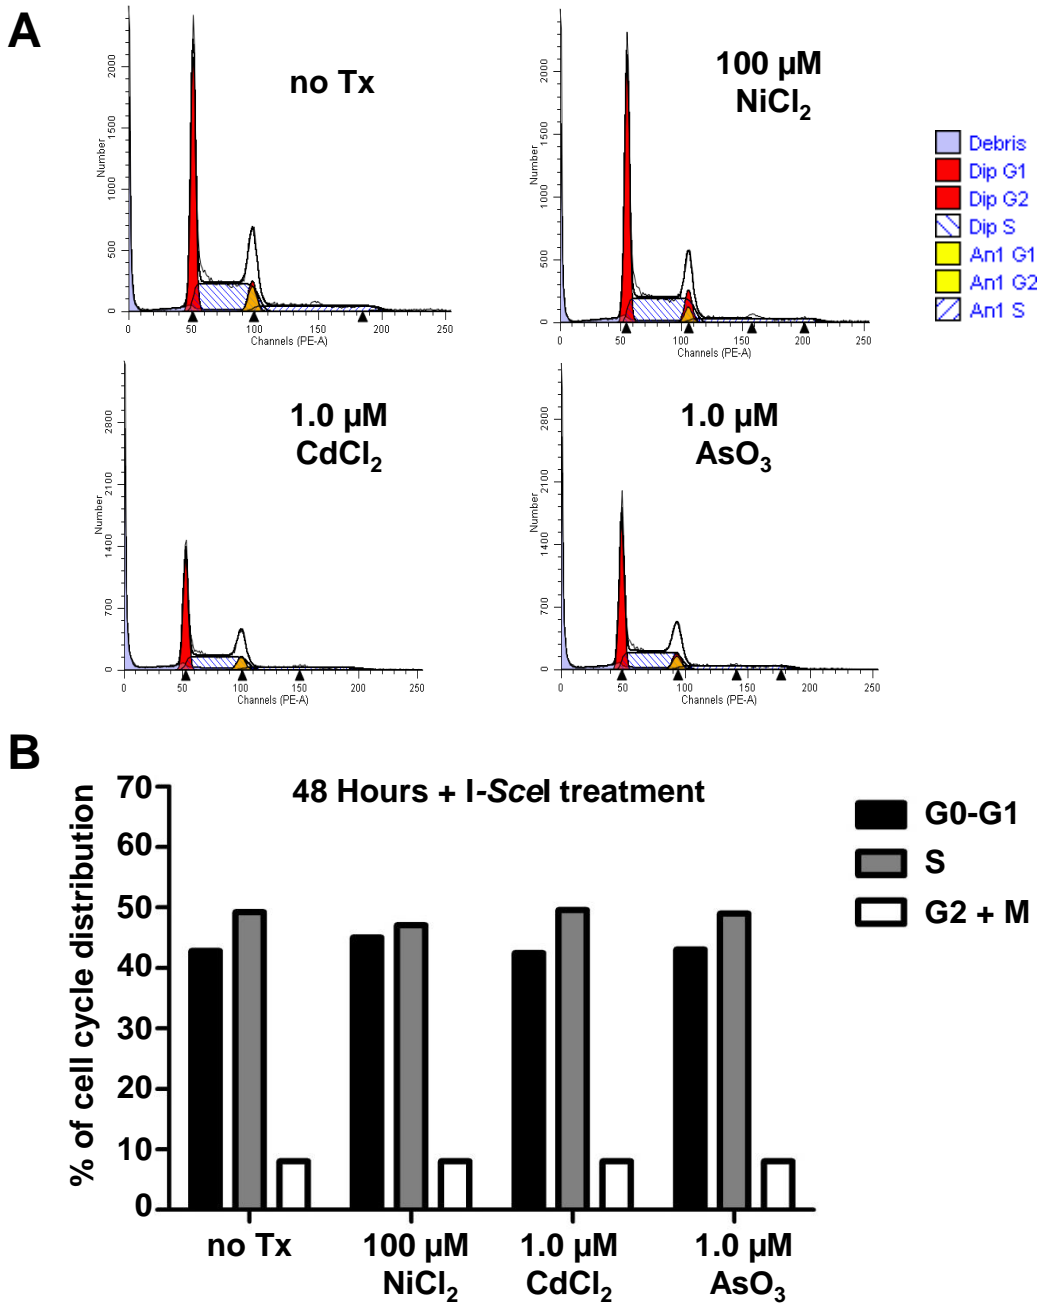

**Supplemental Figure S8. The metal treatments evaluated have minimal to no effect on cell cycle.** I-SceI transfected 0%AARP HEK cells were incubated with media containing 1  $\mu\text{M}$   $\text{CdCl}_2$ , 100  $\mu\text{M}$   $\text{NiCl}_2$ , or 1  $\mu\text{M}$   $\text{AsO}_3$  following the same protocol used to generate the experimental data (Figures 3-5). Untreated cells were used as the reference control (no Tx). The cells were harvested after 48 h exposure time and analyzed with propidium iodide staining to assess cell cycle distribution by FACS analysis. Shown is an example of the results in **A** the raw histograms (note difference in scales) and in **B** graph of the percentages of cells in each phase of the cell.
