# Supplementary material for: Heavy Metal Exposure Influences Double Strand Break DNA Repair Outcomes
Source: PubMed Central journal article supplement (PMC4788447; doi:10.1371/journal.pone.0151367), 2016-03-11
Supplement: pone.0151367.s009.pdf [file pone.0151367.s009.pdf]

## Alignment of NHEJ events

| NHEJ no MH |                   | Deleted region |       |        |                       |               |
|------------|-------------------|----------------|-------|--------|-----------------------|---------------|
| Cd39       | GGCAGCAGAATTGCG   | tgaagccg       | ----- | aaaaaa | -AAAGAATTCTTTCTGCA    | 1549 deletion |
| Cd40       | GGCGGTTACGAGGT    | gaggagat       | ----- | agactc | -CGTCTCAAAAAAAAAA     | 1659 deletion |
| Cd41       | AAAAGCAGGCTTGG    | taccgaga       | ----- | caaaaa | -AAAAAAAAAAGAATTCT    | 1757 deletion |
| Cd55       | CTGAAACCCTGTCTC   | tactataa       | ----- | tcaaaa | -AAAAAAAAAAAAAAAAATTC | 1626 deletion |
| Ni45       | AAAGCAGGCTTGTA    | ccgagaag       | ----- | ataggg | -ATAACAGGGTAATAATAT   | 1410 deletion |
| Ni48       | GGAGACCCAAGCTGG   | ctaggtaa       | ----- | ataggg | -ATAACAGGGTAATAATAT   | 1068 deletion |
| Ni50       | CTGCAGATATCAACA   | agtttcta       | ----- | ataacg | -GGGTAATAATATTTTAA    | 1443 deletion |
| Ni57       | CTGAAAAAAAAATAAAA | aaaaaagg       | ----- | agggat | -CAGGGTAATAATATTTT    | 1108 deletion |
| Ni58       | ACTATAGGGAGACCC   | aagctggc       | ----- | aggtca | -GGAGATCGAGACAATCCT   | 1641 deletion |
| Ni68       | AAAAGCAGGCT       | tggtaccg       | ----- | ctaggg | -ATAACAGGGTAATATAG    | 1332 deletion |
| Ni70       | GTGATCGCACCCTG    | gaactcca       | ----- | taggga | -TAACAGGGTAATATAG     | 1068 deletion |

| NHEJ insertions                            |                   | Deleted region                  |          |       |          |                         |               |
|--------------------------------------------|-------------------|---------------------------------|----------|-------|----------|-------------------------|---------------|
| Untemplated insertions highlighted in blue |                   |                                 |          |       |          |                         |               |
| Cd42                                       | GCCGCGGAGGCTCAGG  | GTAA                            | cctgttat | ----- | cagggtaa | -TAATATTTTTTAAACTTGCT   | 1384 deletion |
| Cd46                                       | GCCTGAAGTCCCAGC   | AAATAT                          | tactcagg | ----- | tttttaac | -TTGCTCTTCAACTGTTGG     | 1253 deletion |
| Cd47                                       | AGGCCGGCGTGGTGG   | TAACAATAA                       | gtcaggcc | ----- | cagtgagc | -CGAGATCGGCCACTG        | 1668 deletion |
| Cd51                                       | CAGGCTTGGTACCGAG  | GGTAACAGGTACC                   | aagcttaa | ----- | cgtctcaa | -AAAAAAAAAAAAAAAAAGAATT | 1745 deletion |
| Cd52                                       | TACAAAAAAGCAGGCT  | AATAT                           | tggtaccg | ----- | aggataac | -AGGGTAATATAGGACCCCA    | 1336 deletion |
| Cd53                                       | GGACAGAGCGTGACT   | AGAGGTA                         | ccgtcaca | ----- | gcataggg | -ATAACAGGGTAATAATATT    | 1123 deletion |
| Ni53                                       | ATAGGGAGACCCAAGC  | GGCACCCAAGCGGCACACTATATACGCTGGC | tggtaccg | ----- | aaatagca | -TAGGGATAACAGGGTAATA    | 1503 deletion |
| Ni55                                       | GCTTAAAGGCCGCGC   | TGAT                            | cggaggct | ----- | aaaaaaaa | -AAAAGAATTCTTTCTGCA     | 1739 deletion |
| Ni59                                       | GCGGAGGCTCAGGCCT  | TCTGCCTATTCTTA                  | ggtatccc | ----- | tagcatag | -GGATAACAGGGTAATAATA    | 1371 deletion |
| Ni60                                       | CGAGAAGCTTAAAGGC  | TT                              | cggcgccg | ----- | ctcttcaa | -CTGTTGGATCCACTTAAA     | 1431 deletion |
| Ni61                                       | CTGCAGCCTGGGGGA   | TTCTAT                          | cagagcgt | ----- | cgctaggg | -ATAACAGGGTAATATAGGA    | 1051 deletion |
| Ni62                                       | GCCGGGCGCGGTGGCT  | TAA                             | caggcctg | ----- | aaccgggg | -AGGCGGAGCTTGCACT       | 1646 deletion |
| Ni63                                       | CTCGGATCCACTAGTC  | ATCATAT                         | cagtgtgg | ----- | gggagggc | -GAGCTTGCAGTGAGCCGAG    | 1739 deletion |
| Ni64                                       | TACCGAGAAGCTTAAA  | TCT                             | ggccggcc | ----- | gcagggcg | -CCGCGACCCATGACCGAG     | 1773 deletion |
| Ni65                                       | CGGAGGCTCAGGCCTGT | TTA                             | tatcccca | ----- | atagggat | -AACAGGGTAATAATATTTT    | 1413 deletion |
| Ni66                                       | ACAAAAAAGCAGGCTT  | TTTGTAT                         | ggtaccga | ----- | cgctaggg | -ATAACAGGGTAATATAGGA    | 1330 deletion |
| Ni71                                       | TGGTACCGAGAAGCTT  | TTCTGCGGGCGGTA                  | aaaggccg | ----- | aagaattc | -TTTTCTGCAGGCGACCG      | 1761 deletion |
| As12                                       | CCGGGCGCGGTGCTC   | TA                              | aggcctgt | ----- | atcgcgcc | -ACTGCACTCCAGCCTG       | 1677 deletion |
| As13                                       | GATCCACTAGTCCAGT  | AT                              | ggtggaat | ----- | gctactcg | -GGAGGCTGAGGGCAGGAGA    | 1728 deletion |
| As15                                       | CTATAGGGAGACCCAA  | TAGTG                           | gctggcta | ----- | atttcttt | -TCTGCAGGCGGCCGCGACA    | 1874 deletion |

**NHEJ MH**

Microhomology highlighted in yellow

Deleted region

|      |                  |                       |                         |               |
|------|------------------|-----------------------|-------------------------|---------------|
| Cd43 | TGTCTCACTATAAA   | tacaaata-----tcaaaaaa | -AAAAAAAAAAAAAAAAATTCTT | 1617 deletion |
| Cd44 | CAGGCTTGGTACCGAG | aagcttaa-----cccgggag | -GCGGAGCTTGCACTGA       | 1674 deletion |
| Cd45 | CTGAAACCCTGT     | ctctact-----caaaaaat  | -TAGCCGGGCGTGGTGGC      | 1476 deletion |
| Cd48 | AATTCGGTGAGCCG   | ggaggcgg-----gtgagccg | -AGATCGCGCCACTG         | 1478 deletion |
| Cd49 | AAGTTGTACAAAAA   | gcaggctt-----aaaaaaa  | -AAAAGAATTCCTTTCTGC     | 1773 deletion |
| Cd50 | ACAAAAA          | aaaaggcc-----aaaaaaa  | -AGAATTCTTTCTGCAGG      | 1455 deletion |
| Cd54 | GGAGGCGGGCGGT    | cgaggaca-----ccgtctca | -AAAAAAAAAAAAAAAAAAT    | 1672 deletion |
| Ni43 | AAGTTGTACAAAAA   | gcaggctt-----aaaaaaa  | -AAAGAATTCCTTTCTGCA     | 1779 deletion |
| Ni44 | CTGAGGCAGGAGAAAT | gcgagaag-----aaagaatt | -CTTTTCTGCAGGCGGCCG     | 1562 deletion |
| Ni46 | GGCGCGGTGGCT     | cctgtaat-----ataacagg | -GTAATAATATTTTTAAAC     | 1383 deletion |
| Ni47 | TACCGAGAAGCTTAAA | ggccgggc-----ctcttcaa | -CTGTTGGATCCACTTAAA     | 1434 deletion |
| Ni49 | GACTCACTATAGGGAG | acccaagc-----ctcgggag | -GCTGAGGCAGGAGAATTG     | 1753 deletion |
| Ni51 | GTACCGAGAAGCTTAA | aggccggg-----cctgta   | -GTCCAGCTACTCGGGA       | 1618 deletion |
| Ni52 | TGTACAAAAAAGCAGG | cttggtac-----ggataacg | -GTAATAATATTTTTAAAC     | 1425 deletion |
| Ni54 | TATAGGGAGACCCAAG | ctggctag-----ttgcagtg | -AGCCGAGATCGCGCCACT     | 1793 deletion |
| Ni56 | ACAAAAAAGCAGGCTT | ggtaccga-----ctatttat | -AACAGGGTAATATAGGAC     | 1333 deletion |
| Ni69 | GGTACCGAGAAGCTTA | aaggccgg-----ggataa   | -CAGGGTAATA             | 1404 deletion |
| As11 | ACCGAGAAGCTTAAAG | gccgggcc-----aaaattag | -CCGGCGTGGTGGTGCGG      | 1589 deletion |
| As14 | TCAACAAGTTTGTACA | aaaaagca-----acccca   | -TTGGTTTAAAAGCCAAT      | 1368 deletion |

**Supplemental Figure S9.** Sequence alignments of the break site flanking sequences of the different type of events repaired through non-homologous end joining after metal treatments. The different types of NHEJ repair events were classified as having no microhomology (no MH), having insertions, having microhomology (MH) or other (not shown). The alignments show the flanking region of the break site with are different features highlighted: Insertions (blue) and MH (yellow). The deleted region is represented by the light blue sequences within the brackets. The size of the deletion is shown on the right in red.
