# Supplementary material for: Heavy Metal Exposure Influences Double Strand Break DNA Repair Outcomes
Source: PLoS One. 2016 Mar 11;11(3):e0151367. doi: 10.1371/journal.pone.0151367 (PMC4788447; doi:10.1371/journal.pone.0151367)
Supplement: S3 Fig — Shown are the examples for nickel and cadmium exposure on the four U2OS cell lines. A logarithmic plot of the gated cells is shown using FITC-A (green fluorescence, x-axis) and PE-A (area of the pulse width, red fluorescence y-axis). Autofluorescence is detected on the diagonal, where cells showing increased green fluorescence are to the right of the diagonal. Autofluorescence are gated to determine the percentage of GFP+ cells (blue). In this example the U2Os cell lines with the four different GFP cassettes were evaluated. The examples shown are: a. untransfected untreated control to correct for background; b. I-SceI transfected no treatment control; c-.treatment with 100 μM NiCl2 and d. treatment with 1 μM. Exposure to the metals alone is not sufficient to induce a GFP signal above the background in any of the four different cells lines. (PDF) [file pone.0151367.s003.pdf]

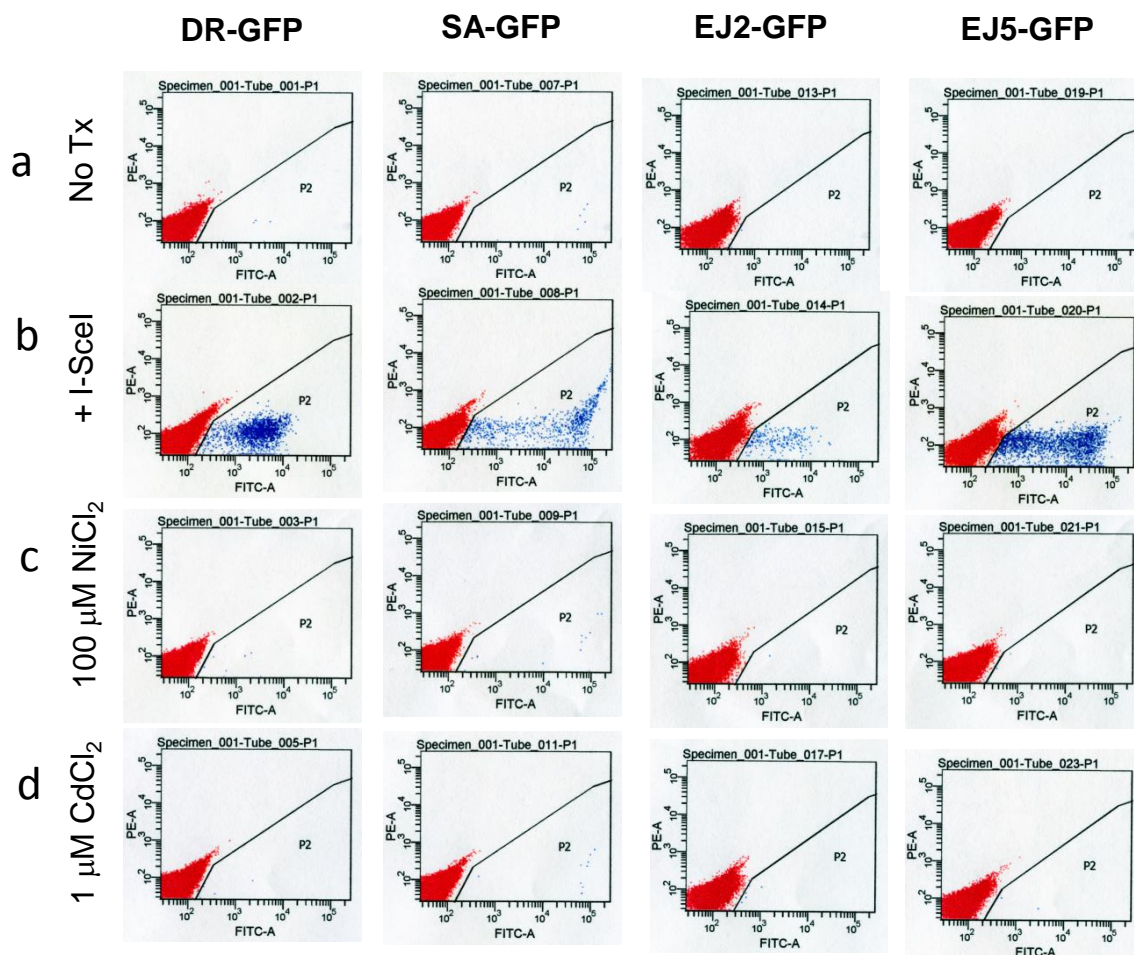

**Supplemental Figure S3. The metal doses evaluated did not induce signals in the U2Os DNA repair cell line assay.** Shown are the examples for nickel and cadmium exposure on the four U2OS cell lines. A logarithmic plot of the gated cells is shown using FITC-A (green fluorescence, x-axis) and PE-A (area of the pulse width, red fluorescence y-axis). Autofluorescence is detected on the diagonal, where cells showing increased green fluorescence are to the right of the diagonal. Autofluorescence are gated to determine the percentage of GFP+ cells (blue). In this example the U2Os cell lines with the four different GFP cassettes were evaluated. . The examples shown are: **a.** untransfected untreated control to correct for background; **b.** I-SceI transfected no treatment control; **c.** treatment with 100  $\mu$ M NiCl<sub>2</sub> and **d.** treatment with 1  $\mu$ M. Exposure to the metals alone is not sufficient to induce a GFP signal above the background in any of the four different cells lines.
