# Supplementary material for: Heavy Metal Exposure Influences Double Strand Break DNA Repair Outcomes
Source: PLoS One. 2016 Mar 11;11(3):e0151367. doi: 10.1371/journal.pone.0151367 (PMC4788447; doi:10.1371/journal.pone.0151367)
Supplement: S5 Table — (XLSX) [file pone.0151367.s014.xlsx]

## Sheet: Sheet1
S5 Table	Sequencing data from rescues Figure 5B and 5C [1.0 uM CdCl2, 1.0 uM AsO3, 100 uM NiCl2 treatment]
	Note untreated samples published in Morales et al, PlosGenet 2015 Mar11;11(3):e1005016. doi: 10.1371
NHEJ MH		MH red underlined
Cd43	10% AARP	CGAGAAGCTTAAAGGCCGGGCGTGGTGGCTCAGGCCTGTAATGCCAGCACTTAGGGAGGCCGTGGCGGGCGGTTCACGAGGTGAGGAGATCGTGACAATCCTCGCTAACACGCTGAAACCCTGTCTCACTATAAA--AAAAAAAAAAAAATTCTTTTCTGCAGGNGGCCGCGACACCATGACCGANTACAAGCCCACCGTGCGCCTGGCCACCCGCGACGACGTGCCCCGCGCCGTGCGCA
Cd44	10% AARP	TACGACTCACTATAGGGAGACCCAAGCTGGCTAGGTAAGCTTGGTACCGAGCTCGGATCCACTAGTCCAGTGTGGTGGAATTCTGCAGATATCAACAAGTTTGTACAAAAAAGCAGGCTTGGTACCGAG-----GCGGAGCTTGCAGTGAGCCGAGATCGCGCCTGCACTCCAGCCTGGGCGACAGAGCGAGACTCCGTCTCAAAAAAAAAAAAAAAAAATTTTTTTTTTGNGGG
Cd45	10% AARP	CAAAAAAGCAGGCTTGGTACCGAGAAGCTTAAAGGCCGGGCGTGGTGGCTCAGGCCTGTAATGCCAGCACTTAGGGAGGCCGTGGCGGGCGGTTCACGAGGTGAGGAGATCGTGACAATCCTCGCTAACACGCTGAAACCCTGT-----TAGCCGGGCGTGGTGGCGGGCGCCTGTAGTCCCAGCTACTCGGGAGGCTGAGGCAGGAGAATTGCGTGAACCCGGGAGGCGGAGCTTGCAGTGAGCCGAGATCGCGCCACTGCACTCCAGCCTGGGCGACAGAGCGAGACTCCGTCTCAAAAAAAAAAAAAAAAGAATTCTTTTCTGCAGGCGGCCGCGACACCATGACCGAGTACAAGCCCACCGTGCGCCTGGCCACCCGCGACGACGT
Cd48	10% AARP	AGGAGTTCGAGAGAATCCTCGCTAACTCGGTGATACCCCGACTCTACCAAAAATTCAAAAATTTAGCCCGGCGTGCTGGCGGCCGCCTGAAGTCCCTGCTACTCAGGAGGCTCAGGCAGCAGAATTCCGTGGAGCCG------AGATCGCGCCACTGCACTCCAGCCTGGGCGACAGAGCGAGACTCCGTCTCAAAAAAAAAAAAAAAA--GAATTCTTTTCCGCAGGCGGCCGCGACACCATGACCGAGTACAAGCCTACCGTGCGCCTGGCCACCCGCGACGACGTGCCCCGCGCCGTGCGCACCCTGGCCGCCGCC-TTCGCC-GGACTACCCCGC
Cd49	10% AARP	AGGGAGACCCAAGCTGGCTAGGTAAGCTTGGTACCGAGCTCGGATCCACTAGTCCAGTGTGGTGGAATTCTGCGGCACCCAAGCGGCACACTATATACGCTGGCAGATATCAACAAGTTTGTACAAAAAAAAA--------------------AGAATTCTTTTCTGCAGG-CGGCCGC-GACAC-CATGACCG-AGTACAAGCCCACCGTG-CGCC-TGGCCACCCG-CGACGACGTGCCCCGCG-CCGTGCGCACCCTGGCCGCCGCCTCGCCGGACTACCCCG-C
Cd50	10% AARP	CCAGCTACTCGGGAGCCTGAGGCAGGAGAATTGCGAGAACCCGGGAGGCGGAGCTAGCAGTGAGCCGAGATCGCGGCACTGCACTCCAGCCTGGGGGACAGAGCGAGACTCCGTCACAAAAAAAAAAAAAAA------GAATTCTTTTCTGCAGGCGGCCGCGACACCATGACCGAGTACAAGCCCACCGTGCGCCTGGCCACCCGCGACGACGTGCCCCGCGCCGTGCGCACCCTNGCCGCCGCC-TTCGCC-GGACTACCCC
Cd54	10% AARP	CAGTGTGGTGGAATTCTGCAGATATCAACAAGTTTGTACAAAAAAGCAGGCTTGGTACCGAGAAGCTTAAAGGCCGGGCGTGGTGGCTCAGGCCTGTAATGCCAGCACTTAGGGAGGCCGTGGCGGGCGGTTCA----AAAAAAAAAAAAAAAAAANTTTTTTTTTGNNGGGG
Ni43	5% AARP	TCGTGAGGAATTAGCTTGGTACTAATACGACTCACTATAGGGAGACCCAAGCTGGCTAGGTAAGCTTGGTACCGAGCTCGGATCCACTAGTCCAGTGTGGTGGAATTCTGCAGATATCAACAAGTTTGTACAAAAAA-----AAAGAATTCTTTTCTGCAGGCGGCCGCGACACCATGACCGAGTACAAGCCCACCGTGCGCCTGGCCACCCGCGACGACGTGCCCCGCGCCGTGCGCACCCTGGCCGCCGCCTCGCCGGACTACCCCGC
Ni44	5% AARP	CAGGAGATCGTGACAATCCTGGCTAACACGCTGAAACCCCGTCTCTACTATAAATACAAAAAATTAGCCGCGCGTGGTGGCGGGCGCCTGAAGTCCCAGCTACTCGGGAGCCTGAGGCAGGAGAATT------CTTTTCTGCAGGCGGCCGCGACACCATGACCGAGT
Ni46	15% AARP	TAGGGAGACCCAAGCTGGCTAGGTAAGCTTGGTACCGAGCTCGGATCCACTAGTCCAGTGTGGTGGAATTCTGCAGATATCAACAAGTTTGTACAAAAAAGCAGGCTTGGTACCGAGAAGCTTAAAGGCCGGGCGCGGTGGCTCAGG---------GTAATAATATTTTTAAACTTGCTCTTCAACTGTTGGATCCATTTAAA-AAAGGCCGGGCGCGGTGGCTCACGC-CTG-TAATCCCA-GCACTTTGGGAGGCCGAGGCGGGCGGATCACGAGGTCAGG-AG-ATCGAGACAATCCTGGCT-AACACGGTGAAAC-CCCGTCTCTAC-TA--AAAATACAAAAAATT-AGCCGGGCGTGGTGGCGGGCGCCTGTAGTCCCAGCTACTCAGGAGGC…
Ni47	15% AARP	TAGCTTGGTACTAATACGACTCACTATAGGGAGACCCAAGCTGGCTAGGTAAGCTTGGTACCGAGCTCGGATCCACTAGTCCAGTGTGGTGGAATTCTGCAGATATCAACAAGTTTGT-CAAAAAAGCAGGCTTGGTACCGAGAAGCTTAAA---------CTGTTGGATCCATTTAAA-AAAGGCCGGGCGCGGTGGCTCACGC-CTG-TAATCCCA-GCACTTTGGGAGGCCGAGGCGGGCGGATCACGAGGTCAGG-AG-ATCGAGACAATCCTGGCT-AACACGGTGAAAC-CCCGTCTCTAC-TA--AAAATACAAAAA-TT-ANCCGGGCGTGGTGGCGGGCGCCTGTAGTCCCAGCTACTCGGGAGGCT-GAGGC-AGGAGA-ATTGCGTGA…
Ni49	10% AARP	GGTGTCGTGAGGAATTAGCTTGGTACTAATACGACTCACTATAGGGAG----GCTGAGGCAGGAGAATTGCGTGAACCCGGGAGGCGGAGCTTGCAGTGAGCCGAGATCGCGCCACTGCACTCCAGCCTGGGCGACAGAGCGAGACTCCGTCTCAAAAAAAAAAAAAAAA
Ni51	15% AARP	CGACTCACTATAGGGAGACCCAAGCTGGCTAGGTAAGCTTGGTACCGAGCTCGGATCCACTAGTCCAGTGTGGTGGAATTCTGCAGATATCAACAAGTTTGTACAAAAAAGCAGGCTTGGTACCGAGAAGCTTAAGTCCCAGCTACTCGGGAGGCTGAGGCAGGAGAATTGCGTGAACCCGGGAGGCGGAGCTTGCAGCGAGCCGAGATCGCGCCACTGCACTCCAGCCTGGGCGACAGAGCGAGACTCCGTCTC---AAAAAAAAAAAAAGAATTCTTTTCTGCAGGCGGCCGCGACACCATGACCGAGTACAAGCCCACCGTGCGCCTGGCCACCCGCGACGACGTGCCCCGCGCCGTGCGCACCCTGGCCGCCGCCTTCGCCGACTACCCCGCC
Ni52	15% AARP	TGTGGTGGAATTCTGCAGATATCAACAAGTTTGTACAAAAAAGCAGG---GTAATAATATTTTTAAACTTGCTCTTCAACTGTTGGATCCATTTAAAAAAGGCCGGGCGCGGTGGCTCACGCCTGTAGTCCCAGCACTTTGGGAGGCCGAGGCGGGCGGATCACGAGGTCAGGAGATCGAGACAATCCTGGCTAACACGGTGAAACCCCGTCTCTACTAAAAATACAAAAAATTAGCCGGGCGTGGTGGCGGGCGCCTGTAGTCCCAGCTACTCGGGAGGCTGAGGCAGGAGAATTGCGTGAACCCGGGAGGCGGAGCTTGCAGTGAGCCGAGATCGCGCCACTGCACTCCAGCCTGGGCGACAGAGCGAGACTCCGTCTCAAAAAAAAAAAAAAAAGA…
Ni54	15% AARP	AGGAATTAGCTTGGTACTAATACGACTCACTATAGGGAGACCCAAG---------------AGCCGAGATCGCGCCACTGCACTCCAGCCTGGGCGACAGAGCGAGACTCCGTCTC--AAAAAAAAAAAAAAGAATTCTTTTCTGCAGGCGGCCGCGACACCATGACCGA
Ni56	15% AARP	AGCTTGGTACTAATACGACTCACTATAGGGAGACCCAAGCTGGCTAGGTAAGCTTGGTACCGAGCTCGGATCCACTAGTCCAGTGTGGTGGAATTCTGCAGATATCAACAAGTTTGTACAAAAAAGCAGGCT---TAACAGGGTAATATAGGACCCCATTGGTTTAAAAGGCCAATACGTTTAAAACCCGCGTTTCTTCCTTTTAAATAGCATAGGGATAACGGAGTAATAATATTTTTAAACTTGCTCTTCAACTGTTGGATCCATTTAAAAAAGGCCGGGCGCGGTGGCTCACGCCTGTAATCCCAGCACTTTGGGAGGCCGAGGCGGGCGGATCACGAGGTCAGGAGATCGAGACAATCCTGGCTAACACGGTGAAACCCCGTCTCTACTAAAAAT…
Ni69	15% AARP	ACCCAAGCTGGCTAGGTAAGCTTGGTACCGAGCTCGGATCCACTAGTCCAGTGTGGTGGAATTCTGCAGATGTCAACAAGTTTGTACAAAAAAGCAGGCTTGGTACCGAGAAGCTTA---CAGGGTAATAATATTTTTAAACTTGCTCTTCAACTGTTGGATCCATTTAAAAAGGGCCGGGCGCGGTGGCTCACGCCTGTAATCCCAGCACTTTGGGAGGCCGAGGCGGGCGGATCACGAGGTCAGGAGATCGAGACAATCCTGGCTAACACGGTGAAACCCCGTCTCTACTAAAAATACAAAAAATTAGCCGGGCGTGATGGCGGGCGCCTGTAGTCCCAGCTACTCGGGAGGCTGAGGCAGGAGAATTGCGTGAACCCGGGAGGCGGAGCTTGCAGT…
As11	5%AARP	CTGGCTAGGTAAGCTTGGTACCGAGCTCGGATCCACTAGTCCAGTGTGGTGGAATTCTGCAGATATCAACAAGTTTGTACAAAAAAGCAGGCTTGGTACCGAGAAGCTTAAAG----CCGGGCGTGGTGGCGGGCGCCTGTAGTCCCAGCTACTCGGGAGGCTGAGGCAGGAGAATTGCGTGAACCCGGGAGGCGGAGCTTGCAGTGAGCCGAGATCGCGCCACTGCACTCCAGCCTGGGCGACAGAGCGAGACTCCGTCTCAAAAAAAAAAAAAAAAGAATTCTTT
As14	5% AARP	GGTGTCGTGAGGAATTAGCTTGGTACTAATACGACTCACTATAGGGAGACCCAAGCTGGCTAGGTAAGCTTGGTACCGAGCTCGGATCCACTAGTCCAGTGTGGTGGAATTCTGCAGATATCAACAAGTTTGTACA----------------------TTGGTTTAAAAGGCCAATACGTTTAAAACCCGCGTTTCTTCCTTTTAAATAGCATAGGGATAACAGGGTAATAATATTTTTAAACTTGCTCTTCAACTGTTGGATCCATTTAAAAAAGGCCGGGCGCGGTGGCT
NHEJ Insertions		inserts black underlined
Cd42	10% AARP	ACTCACTATAGGGAGACCCAAGCTGGCTAGGTAAGCTTGGTACCGAGCTCGGATCCACTAGTCCAGTGTGGTGGAATTCTGCAGATATCAACAAGTTTGTACAAAAAAGCAGGCTTGGTACCGAGAAGCTTAAAGGCCGGCCGCGGAGGCTCAGG----GTAA----TAATATTTTTAAACTTGCTCT
Cd46	10% AARP	GCCAGCACTTAGGGAGGCCGTGGCGGGCGGTTCACGAGGTGAGGAGATCGTGACAATCCTCGCTAACACGCTGAAACCCTGTCTCTACTATAAATACAAATAATTAGCCGCGCGTGGTGGTGGGCGCCTGAAGTCCCAGC----AAATAT-----TTGCTCTTCAACTGTTGGATCCATTTAAAAAAGGCCGGGCGCGGTGGCTCACGCCTGTAATCCCAGCACTTTG
Cd47	10% AARP	ACCGAGCTCGGATCCACTAGTCCAGTGTGGTGGAATTCTGCAGATATCAACAAGTTTGTACAAAAAAGCAGGCTTGGTACCGAGAAGCTTAAAGGCCGGGCGTGGTGG-----TAACAATAA---CGAGATCGCGCCACTGCACTCCAGCCTGGGCGACAGAGCGAGACTCCGTCTCAAAAAAAAAAAAAAAAAAATTNTTTTTTGCGGGGGGCCGC
Cd51	10% AARP	TACGACTCACTATAGGGAGACCCAAGCTGGCTAGGTAAGCTTGGTACCGAGCTCGGATCCACTAGTCCAGTGTGGTGGAATTCTGCAGATATCAACAAGTTTGTACAAAAAAGCAGGCTTGGTACCGAG----GGTAACAGGGTACC-----AAAAAAAAAAAAAAGAATTCTTTTCTGCAGGCGGCCGCGACACCATGACCGAGTACAAGCCCACCGTGCGCCTGGCCACCCGCGACGACGTGCCCCGCGCCGTGCGCACCCTGGCCGCCGCCTTCGC
Cd52	10% AARP	GCTCGGATCCACTAGTCCAGTGTGGTGGAATTCTGCAGATATCAACAAGTTTGTACAAAAAAGCAGGCT--------AATAT----AGGGTAATATAGGACCCCATTGGTTTAAAAGGCCAATACGTTTAAAACCCGCGTTTCTTCCTTTTAAATAGCATAGGGATAACAGGGTAATAATATTTTTAAACTTGCTCTTCAACTGTTGGATCCATTTAAAAAAGGCCGGGCGCGGTGGCTCACGCCTGTAATCCCAGCACTTTGGGAGGCCGAGGCGGGCGGATCACGAGGTCAGGAGATCGAGACAATCCTGGCTAACACGGTGAAACCCCGTCTCTACTAAAAATACAAAAAATTAGCCGGGCGTGGTGGCGGGCGCCTGTAGTCCCAGCTACTCGGG…
Cd53	10% AARP	CTGAGGCAGCAGAATTGCGAGAACCCGGGTGGCGGAGCTAGCAGTGAGCGGAGATCGCGGCACTGCACTGCAGCCTGGGGGACAGAGCGTGACT---AGAGGTA----ATAACAGGGTAATATAGGACCCCATTGGTTTAAAAGGCCAATACGTTTAAAACCCGCGTTTCTTCCTTTTAAATAGCATAGGGATAACAGGGTAATAATATTTTTAAACTTGCTCTTCA
Ni53	15% AARP	ATCTTGGTTCATTCTCAAGCCTCAGACAGTGGTTCAAAGTTTTTTTCTTCCATTTCAGGTGTCGTGAGGAATTAGCTTGGTACTAATACGACTCACTATAGGGAGACCCAAGC-----GGCACCCAAGCGGCACACTATATACGCTGGC------TAGGGATAACAGGGTAATAATATTTTTAAACTTGCTCTTCAACTGTTGGATCCATTTAAAAAAGGCCGGGCGCGGTGGCTCACGCCTGTAATCCCAGCACTTTGGGAGGCCGAGGCGGGCGGATCACGAGGTCAGGAGATCGAGACAATCCTGGCTAACACGGTGAAACCCCGTCTCTACTAAAAATACAAAAAATTAGCCGGGCGTGGTGGCGGGCGCCTGTAGTCCCAGCTACTCGGGAGGC…
Ni55	15% AARP	GGTAAGCTTGGTACCGAGCTCGGATCCACTAGTCCAGTGTGGTGGAATTCTGCAGATATCAACAAGTTTGTACAAAAAAGCAGGCTTGGTACCGAGAAGCTTAAAGGCCGGCCG--TGAT--AAAAGAATTCTTTTCTGCAGGCGGCCGCGACACCATGACCGAGTACAAGCCC
Ni59	15% AARP	AGCTGGCTAGGTAAGCTTGGTACCGAGCTCGGATCCACTAATCTAGTGTGGNGGAATTCTGCATATATCATGGATTTTGTA-ANAAAAGCAGGTTTGGTACCGATAATGTTAAAAGGCCGGCCGCGGAGGCTCAGGCCT-----TCTGCCTATTCTTA-GGATAACAGGGTAATAATATTTTTAAACTTGCTCTTCAACTGTTGGATCCATTTAAAAAAGGCCGGGCGCGGTGGCTCACGCCTGTAATCCCAGCACTTTGGGAGGCCGAGGCGGGCGGATCACGAGGTCAGGAGATCGAGACAATCCTGGCTAACACGGTGAAACCCCGTCTCTACTAAAAATACAAAAAATTATCCGGGAGTGGTGTCGGGCGCCTGTAATCCAAGCTACTCNGGACG…
Ni60	15% AARP	CAAGTTTGTACAAAAAAGCAGGCTTGGTACCGAGAAGCTTAAAGGC----TT----CTGTTGGATCCACTTAAAAAAGGCCGGGCGCGGTGGCTCACGCCTGTAATCCCAGCACTTTGGGAGGCCGAGGCGGGCGGATCACGAGGTCAGGAGATCGAGACAATCCTGGCTAACACGGTGAAACCCCGTCTCTACTAAAAATACAAAAAATTAGCCGGGCGTGGTGGCGGGCGCCTGTAGTCCCAGCTACTCGGGAGGCTGAGGCAGGAGAATTGCGTGAACCCGGGAGGCGGAGCTTGCAGTGAGCCGAGATCGCGCCACTGCACTCCAGCCTGGGCGACAGAGCGAGACTCCGTCTCAAAAAAAAAAAAAAA---GAATTCTTTTCTGCAGGCGGCCG…
Ni61	5% AARP	AGCCGCGCGTGGTGGCGGGCGCCTGAAGTCCCAGCTACTCGGGAGCCTGAGGCAGGAGAATTGCGAGAACCCGGGAGGCGGAGCTAGCAGTGAGCCGAGATCGCGGCACTGCACTCCA-GCCTGGGGGA---TTCTAT----ATAACAGGGTAATATAGGACCCCATTGGTTTAAAAGGCCAATACGTTTAAAACCCGCGTTTCTTCCTTTTAAATAGCATA
Ni62	5% AARP	AGGGAGACCCAAGCTGGCTAGGTAAGCTTGGTACCGAGCTCGGATCCACTAGTCCAGTGTGGTGGAATTCTGCAGATATCAACAAGTTTGTACAAAAAAGCAGGCTTGGTACCGAGAAGCTTAAAGGCCGGGCGCGGTGGCT---TAA----AGGCGGAGCTTGCAGTGAGCCGAGATCGCGCCACTGCACTCCAGCCTGGGCGACAGAGCGAGACTCCGTCTCAAAAAAAAAAAAAAAAAAATTTTTTTTTGG
Ni63	10% AARP	GTGGTTCAAAGTTTTTTTCTTCCATTTCAGGTGTCGTGAGGAATTAGCTTGGTACTAATACGACTCACTATAGGGAGACCCAAGCTGGCTAGGTAAGCTTGGTACCGAGCTCGGATCCACTAGTC---ATCATAT---GAGCTTGCAGTGAGCCGAGATCGCGCCACTGCACTCCAGCCTGGGCGACAGAGCGAGACTCCGTCTCAAAAAAAAAAAAAA
Ni64	15% AARP	GTCCAGTGTGGTGGAATTCTGCAGATATCAACAAGTTTGTACAAAAAAGCAGGCTTGGTACCGAGAAGCTTAAA---TCT--CCGCGACACCATGACCGAGTACAAGCCCACCGTGCGCCTGG
Ni65	15% AARP	GTCCAGTGTGGTGGAATTCTGCAGATATCAACAAGTTTGTACAAAAAAGCAGGCTTGGTACCAAGAAGCTTAAAGGCCGGCCGCGGAGGCTCAGGCCTGT-------TTA-----AACAGGGTAATAATATTTTTAAACTTGCTCTTCAACTGTTGGATCCATTTAAAAAAGGCCGGGCGCGGTGGCTCACGCCTGTAATCCCAGCACTTTGGGAGGCCGAGGCGGGCGGATCACGAGGTCAGGAGATCGAGACAATCCTGGCTAACACGGTGAAACCCCGTCTCTACTAAAAATACAAAAAATCAGCCGGGCGTGGTGGCGGGCGCCTGTAGTCCCAGCTACTCGGGAGGCTGAGGCAGGAGAATTGCGTGAACCCGGGAGGCGGAGCTTGCAGTGAG…
Ni66	15% AARP	GAATTCTGCAGATATCAACAAGTTTGTACAAAAAAGCAGGCT-------TTTTGTAT----ATAACAGGGTAATATAGGACCCCATTGGTTTAAAAGGCCAATACGTTTAAAACCCGCGTTTCTTCCTTTTAAATAGCATAGGGATAACAGGGTAATAATATTTTTAAACTTGCTCTTCAACTGTTGGATCCATTTAAAAAAGGCCGGGCGCGGTGGCTCACGCCTGTAATCCCAGCACTTTGGGAGGCCGAGGCGGGCGGATCACGAGGTCAGGAGATCGAGACAATCCTGGCTAACACGGTGAAACCCCGTCTCTACTAAAAATACAAAAAATTAGCCGGGCGTGGTGGCGGGCGCCTGTAGTCCCAGCTACTCGGGAGGCTGAGGCAGGAGAATTG…
Ni71	10% AARP	TACAAAAAAGCAGGCTTGGTACCGAGAAGCTT---TTCTGCGGGCGGTA---------TTTTCTGCAGGCGACCGCGACACCATGACCGAGTACAAGCCCACCGGGCGCCTGGCCCCCCCCGACGACGTGCCCCGCGCCGTGCGCGCCCTGGCCGCCGCCTTCGCCGACTACCCCGCCACCCGCCACACCGTGGACCCCGACCGCCACATTGAACGCGTGACCGANTTGGAAGAGCTGTTCCTGACCCGCGTGGGCCTGGACATCGGCAAGGTGTGGGTGGCCGACGACGGGGCGGCCGTGGCCGTGTGGACCACCCCGGAAAGCGTGAANGCGGANGCCGTGTTCGCCGAGATCGGCCCCCGCNTGGCCGAGTTGNCCGGNAGCCGCCTGTNCGCCCA…
As12	5% AARP	AGCTGGCTAGGTAAGCTTGGTACCGAGCTCGGATCCACTAGTCCAGTGTGGTGGAATTCTGCAGATATCAACAAGTTTGTACAAAAAAGCAGGCTTGGTACCGAGAAGCTTAAAGGCCGGGCGCGGTGGCTC--TA-----CTGCACTCCAGCCTGGGCGACAGAGCGAGACTCCGTCTCAAAAAAAAAAAAAAAAAATTTTTTT
As13	5% AARP	CGACTCACTATAGGGAGACCCAAGCTGGCTAGGTAAGCTTGGTACCGAGCTCGGATCCACTAGTCCAGT----AT-----GGAGGCTGAGGCAGGAGAATTGCGTGAACCCGGGAGGCGGAGCTTGCAGTGAGCCGAGATCGCGCCACTGCACTCCAGCCTGGGGGACAGAGCGAGATTCCGT-AAAAAAAAAAAAAAA-AATTCTTTTCTGCAGGCGGCCGCGACACCATGACCGAGTACAAGCCCACCGTGCGCCTGGCCACCCGCGACGACGTGCCCCGCGCCGTGCGCACCCTGGCCGCCGCCT-CGCCGACTACCCC
As15	5% AARP	GTCGTGAGGAATTAGCTTGGTACTAATACGACTCACTATAGGGAGACCCAA--TAGTG--------TCTGCAGGCGGCCGCGACACCATGACCGAGTACAAGCCCACCGTGCGCCTGGCCACCCGCGACGACGTGCCCCGCGCCGTGCGCACCCTGGCCGCCGCCTTCGCCGACTACCCCGCCACCCGCCACACCGTGGACCCCGACCGCCACATTGAACGCGTGACCGAGTTGCAAGAGCTGTTCC
NHEJ NO MH
Cd39	10% AARP	AACACGCTGAAACCCTGTCTCTACTATAAATACAAATAATTAGCCGCGCGTGGTGGTGGGCGCCTGAAGTCCCAGCAACTCGGGAGCCTGAGGCAGCAGAATTGCG-----------AAAGAATTCTTTTCTGCAGGCGGCCGCGACACCATGACC
Cd40	10% AARP	CGAGAAGCTTAAAGGCCGGGCGTGGTGGCTCAGGCCTGTAATGCCAGCACTTAGGGAGGCCGTGGCGGGCGGTTCACGAGGT----------CGTCTCAAAAAAAAAAAAAAAAAAATTTTTTTTTGCG
Cd41	10% AARP	GGTAAGCTTGGTACCGAGCTCGGATCCACTAGTCCAGTGTGGTGGAATTCTGCAGATATCAACAAGTTTGTACAAAAAAGCAGGCTTGG------------AAAAAAAAAAAGAATTCTTTTCTGCAGGCGGCCGCGACACCATGACCGAGTA
Cd55	10% AARP	TGGTGGCTCAGGCCTGTAATGCCAGCACTTAGGGAGGCCGTGGCGGGCGGTTCACGAGGTGAGGAGATCGTGACAATCCTCGCTAACACGCTGAAACCCTGTCTC--------------AAAAAAAAAAAAAAATTCTTTTCTGCAGGNGGCCGC
Ni45	5% AARP	GCTTGGTACTAATACGACTCACTATAGGGAGACCCAAGCTGGCTAGGTAAGCTTGGTACCGAGCTCGGATCCACTAGTCCAGTGTGGTGGAATTCTGCAGATATCAACAAGTTTGTACAAAAAAGCAGGCTTGGTA--------ATAACAGGGTAATAATATTTTTAAACTTGCTCTTCAACTGTTGGATCCATTTAAAAAAGGCCGGGCGCGGTGGCTCACGCCTGTAATCCCAGCACTTTG
Ni48	15% AARP	TCAGACAGTGGTTCAAAGTTTTTTTNTTCCATTTCAGGTGTCGTGAGGAATTAGCTTGGTACTAATACGACTCACTATAGGGAGACCCAAGCTGG-------ATAACAGGGTAATAATATTTTTAAACTTGCTCTTCAACTGTTGGATCCATTTAAAAAAGGCCGGGCGCGGTGGCTCACGCCTGTAATCCCAGCACTTTGGGAGGCCGAGGCGGGCGGATCACGAGGTCAGGAGATCGAGACAATCCTGGCTAACACGGTGAAACCCCGTCTCTACTAAAAATACAAAAAATTAGCCGGGCGTGGTGGCGGGCGCCTGTAGTCCCAGCTACTCGGGAGGCTGAGGCAGGAGAATTGCGTGAACCCGGGAGGCGGAGCTTGCAGTGAGCCGAGATCGCG…
Ni50	15% AARP	TTTTTCTTCCATTTCAGGTGCCGTGAGGAATTAGCTTGGTACTAATACGACTCACTATAGGGAGACCCAAGCTGGCTAGGTAAGCTTGGTACCGAGCTCGGATCCACTAGTCCAGTGTGGTGGAATTCTGCAGATATCAACAA---------TAACAATAACGGGTAATAATATTTTTAAACTTGCTCTTCAACTGTTGGATCCATTTAAAAAAGGCCGGGCGCGGTGGCTCACGCCTGTAATCCCAGCACTTTGGGAGGCCGAGGCGGGCGGATCACGAGGTCAGGAGATCGAGACAATCCTGGCTAACACGGTGAAACCCCGTCTCTACTAAAAATACAAAAAATTAGCCGGGCGTGGTGGCGGGCGCCTGTAGTCCCAGCTACTCGGGAGGCTGAG…
Ni57	15% AARP	GGAGGCTCAGGCAGCAGAATTCCGTGAAGCCGGGACGCGGAGGTTGCAGAGAGCCGTGATCGCACCACTGGACTCCACCCTGGGTGACAGAACGAGACACCGTCTGAAAAAAATAAAA-----------------CAGGGTAATAATATTTTTAAACTTGCTCTTCAACTGTTGGATCCATTTAAAAAAGGCCGGGCGCGGTGGCTCACGCCTGTAATCCCAGCACTTTGGGAGGCCGAGGCGGGCGGATCACGAGGTCAGGAGATCGAGACAATCCTGGCTAACACGGTGAAACCCCGTCTCTACTAAAAATACAAAAAATTAGCCGGGCGTGGTGGCGGGCGCCTGTAGTCCCAGCTACTCGGGAGGCTGAGGCAGGAGAATTGCGTGAACCCGGGA…
Ni58	15% AARP	TGTCGTGAGGAATTAGCTTGGTACTAATACGACTCACTATAGGGAGACCC----------------------GGAGATCGAGACAATCCTGGCTAACACGGTGAAACCCCGTCTNTACTAAAAATACAAAAAATTAGCCGGGCGTGGTGGCGGGCGCCTGTAGTCCCAGCTACTCGGGAGGCTGAGGCAGGAGAATTGCGTGAACCCGGGAGGCGGAGCTTGCAGTGAGCCGAGATCGCGCCACTGCACTCCAGCCTGGGCGACAGAGCGAGACTCCGTCTCAAAAAAAAAAAAAAAAAAGAATTCTTTTCCGCAGGCGGCCGCGACACCATGACCGAGTACAAGCCCACCGTGCGCCTGGCCACCCGCGACGACGTGCCCCGCGCCGTGCGCACCCTG…
Ni68	15% AARP	GGTAAGCTTGGTACCGAGCTCGGATCCACTAGTCCAGTGTGGTGGAATTCTGCAGATATCAACAAGTTTGTACAAAAAAGCAGGCT---ATAACAGGGTAATATAGGACCCCATTGGTTTAAAAGGCCAATACGTTTAAAACCCGCGTTTCTTCCTTTTAAATAGCATAGGGATAACAGGGTAATAATATTTTTAAACTTGCTCTTCAACTGTTGGATCCATTTAAA-AAAGGCCGGGCGCGGTGGCTCACGCCTGTAATCCCAGCACTTTGGGAGGCCGAGGCGTGCGGATCACGAGGTCAGGAGATCGAGACAATCCTGGCTAACACGGTGAAACCCCGTCTCTACTAAAAATACAAAAAATTAGCCGGGCGTGGTGGCGGGCGCCTGTAGTCCCTG…
Ni70	15% AARP	TACCAAAAATTCAAAAATTTAGCCCGGCGTGCTGGCGGCCGCCTGAAGTCCCTGCTACTCAGGAGGCTCAGGCAGCAGAATTCCGTGAAGCCGGGACGCGGAGGTTGCAGAGAGCCGTGATCGCACCACTG------------TAACAGGGTAATATAGGACCCCATTGGTTTAAAAGGCCAATACGTTTAAAACCCGCGTTTCTTCCTTTTAAATAGCATAGGGATAACAGGGTAATAATATTTTTAAACTTGCTCTTCAACTGTTGGATCCATTTAAAAAAGGCCGGGCGCGGTGGCTCACGC
NHEJ other
Ni67	5% AARP	GTCGTGAGGAATTAG-CTTG-GTACTN-AATACGACTCACTTATAGGGAGACCCAAGCTGGCTAGGTAAGCTTGGTACCGAGCTCGGATCCACTAGTCCAGT-GTGGTGGAATTCTGCAGATATCAACAAGTTTGTACAAAAAAGCAGGCTTGGTACCGAGTAGCTGGGACTACAGGCGCCCGCCAC-CACGCGCGGCTAATTTTTTGTATTTTTAGTAGAGACGGGGTTTCACCGTGTTAGCCAGGATTGTCTCGATCTCCTGACCTCGTGATCCGCCCGCCTCGGCCTCCCAAAGTGCTGGGATTACAGGCGTGAGCCACCGCGCCCGGCCGAATTCTTTTCTGCA-GGCGGCCGCGACACCATGACCGAGTACAAGCCCACCGTGCGCCTG-GCCA…
